# Supplementary material for: Is the Bombali virus pathogenic in humans?
Source: Oxford University Press journal article supplement (doi:10.1093/bioinformatics/btz267), 2019-04-15
Supplement: bioinformatics_35_19_3553_s4.zip [file bioinformatics_35_19_3553_s4.zip]

## **Is the Bombali virus pathogenic in humans?**

Henry J Martell\*, Stuart G Masterson\*, Jake E. McGreig, Martin Michaelis§, Mark N Wass§

Industrial Biotechnology Centre and School of Biosciences, University of Kent, Canterbury, Kent, CT2 7NJ, UK.

§To whom correspondence should be addressed

[m.michaelis@kent.ac.uk](mailto:m.michaelis@kent.ac.uk) +44 1227 827804

[m.n.wass@kent.ac.uk](mailto:m.n.wass@kent.ac.uk) +44 1227 827626

\*equal contribution

## **Supplementary Material**

## Supplementary Methods

### Ebolavirus Nomenclature

The virus nomenclature in this report follows the recommendations set by Kuhn et al., *Filoviridae* is the family, in the order *Mononegavirales*. Both of these terms are always italicised when referenced. The genus is known as *Ebolavirus*, and is only italicised when referring to the genus, but not when referring to physical viruses, virus properties, or constituent virus parts such as proteins or genomes. Ebolavirus Disease (EVD) also remains unitalicised. The five individual species are subsequently referred to as *Bundibugyo ebolavirus* (type virus: *Bundibugyo virus*, BDBV), *Reston ebolavirus* (type virus: *Reston virus*, RESTV), *Sudan ebolavirus* (type virus: *Sudan virus*, SUDV), *Tai Forest ebolavirus* (type virus: *Tai Forest virus*, TAFV) and *Zaire ebolavirus* (type virus: *Ebola virus*, EBOV) (Kuhn et al. 2014).

### Collection of *Ebolavirus* Genomes

All ebolavirus genome sequences were obtained from the National Center for Biotechnology Information (NCBI) (Brister et al. 2015), the Virus Pathogen Resource (ViPR) (Pickett et al. 2012), as well as taken from a repository obtained from (Urbanowicz et al. 2016), available here: <https://github.com/ebov/space-time>. Duplicate sequences present in >1 of the databases were filtered out during initial sample collection, with the order of source preference being NCBI > ViPR > Urbanowicz et al. Supplementary Table 1 summarises the sources used for the set of *Ebolavirus* genomes.

Two Bombali virus sequences were obtained from NCBI (GenBank IDs MF319185, MF319186 respectively). MF319185 was used as the reference sequence and the residues from this were used whenever the two sequences had different amino acids at any given SDP.

### Genome Processing and Filtering

For each sample genome, open reading frames (ORFs) were identified using the EMBOSS getorf tool (Rice et al. 2000), and the resulting ORFs were matched to the UniProt *Ebola virus* reference protein sequences using BLAST (Camacho et al.

2009; Bateman et al. 2015). The top ORF hit for each *Ebola virus* protein was then used as the protein sequence for that sample, for all proteins except GP. The ebolavirus GP protein is the result of mRNA editing, due to a slippery 7A-motif that is translated as eight A nucleotides, with the regular ORF containing an early stop codon (Volchkov et al. 1995). The GP ORF hits were further processed by editing the identified ORF to swap the 7A-motif for 8 A nucleotides. ORFs were then re-identified for the edited sequence and BLAST was used to search against the *Ebola virus* reference proteins.

After these steps, ebolavirus samples that did not have a BLAST hit with >90% coverage compared to the *Ebola virus* reference protein, for each of the seven proteins, was removed. Samples with poor metadata, such as unknown host or data were also removed (partial dates were allowed, e.g. if only the year of collection was known). This was to ensure that only high-quality samples were analysed, as incomplete data could affect subsequent analyses. Supplementary Table 2 summarises the samples that were removed in this step, and a full list of the samples that were retained can be found in Supplementary File 2.

## **Genome Sequence Alignment and Identification of Specificity Determining Positions**

Clustal Omega was used to generate sequence alignments for each of the ebolavirus proteins (Sievers et al. 2011), and the individual sequence identities were obtained from the Clustal Omega output. Jensen-Shannon divergence scores were then calculated for each protein (Capra & Singh 2007). S3det was used in supervised mode to find specificity determining positions (SDPs), with sequences assigned to two groups prior to running S3Det (Rausell et al. 2010). Group 1 contained all of the human pathogenic sequences (*Ebola virus*, *Sudan virus*, *Bundibugyo virus*, and *Tai Forest virus*) and group 2 contained all of the human non-pathogenic sequences (*Reston virus*). All SDPs are referred to by the amino acid in the *Ebola virus* protein sequence, the position in the *Ebola virus* reference protein sequence, and the corresponding amino acid in the *Reston virus* protein sequence,

e.g. G20A meaning at position 20 *Ebola virus* has a glycine residue and *Reston virus* has an alanine residue.

## Structural Analysis of SDPs

All available ebolavirus protein structures were downloaded from the Protein Databank (PDB) (Berman et al. 2000), and SDPs were mapped to the highest quality structure available, based on structure resolution and coverage. Multimeric protein structures were used to analyse the effects of the SDPs on partner interactions. Where structures were unavailable from the PDB, proteins were modelled using Phyre2 with default settings (Kelly et al. 2015). Supplementary Table 3 summarises the structures used for analysis. PyMOL (<https://pymol.org/2/>) was used to visualise the identified SDPs in the protein structures and generate images.

For the subset of SDPs mapped to structures, multiple computational tools were used to predict the functional effects of each SDP. mCSM was used to predict the effect on protein stability (Pires et al. 2014), where the change in stability ( $\Delta\Delta G$ ) is measured in kcal/mol, with negative values being destabilising and positive values being stabilising. Relative solvent accessibility of SDP residues was also calculated using mCSM. BLOSUM62 scores were assigned to each SDP, with the score calculated for the change between the *Ebola virus* sequence and the *Reston virus* sequence wherever there was variation amongst the pathogenic species.

## Phylogenetic Trees

Whole genome alignments were performed using Clustal Omega, whilst the alignments for each protein were performed using TranslatorX (Abascal et al. 2010), which aligns protein-coding nucleotide sequences based on their corresponding amino acid translations. Bayesian trees, for each protein and genome, were then produced using BEAUTI and BEAST 1.10.4 (Suchard et al. 2018), performed on the CIPRES Science Gateway (Miller et al. 2010). The consensus tree for each set of 10,000 trees was then calculated using TreeAnnotator, and the nodes were labelled with the posterior probabilities. These trees were then analysed and plotted in R using the “ape” package.

The Maximum Phylogenetic trees were produced using RaxML8.2.10 on the CIPRES Science Gateway, with 1000 Bootstrap replicates run to obtain the best scoring ML tree for each set of sequences. These were plotted and annotated in FigTree [<http://tree.bio.ed.ac.uk/software/figtree/>]. Species labels were added to all trees using Inkscape.

## References

- Abascal F, Zardoya R, Telford MJ, 2010). TranslatorX: multiple alignment of nucleotide sequences guided by amino acid translations. *Nucleic Acids Research*, 38(W7) pp.13.
- Bateman, A. et al., 2015. UniProt: A hub for protein information. *Nucleic Acids Research*, 43(D1), pp.D204–D212.
- Berman, H.M. et al., 2000. The protein data bank. *Nucleic acids research*, 28(1), pp.235–242.
- Brister, J.R. et al., 2015. NCBI viral Genomes resource. *Nucleic Acids Research*, 43(D1), pp.D571–D577.
- Camacho, C. et al., 2009. BLAST+: architecture and applications. *BMC bioinformatics*, 10, p.421.
- Capra, J.A. & Singh, M., 2007. Predicting functionally important residues from sequence conservation. *Bioinformatics*, 23(15), pp.1875–1882.
- Kelly, L.A. et al., 2015. The Phyre2 web portal for protein modelling, prediction, and analysis. *Nature Protocols*, 10(6), pp.845–858.
- Kuhn, J.H. et al., 2014. Nomenclature- and database-compatible names for the Two Ebola virus variants that emerged in guinea and the Democratic Republic of the Congo in 2014. *Viruses*, 6(11), pp.4760–4799.
- Miller, M. A., Pfeiffer, W. & Schwartz, T., 2010 In *Proceedings of the Gateway Computing Environments Workshop (GCE)* 1–8
- Pickett, B.E. et al., 2012. ViPR: An open bioinformatics database and analysis resource for virology research. *Nucleic Acids Research*, 40(D1), pp.593–598.
- Pires, D.E. V, Ascher, D.B. & Blundell, T.L., 2014. mCSM: Predicting the effects of mutations in proteins using graph-based signatures. *Bioinformatics*, 30(3), pp.335–342.
- Rausell, A. et al., 2010. Protein interactions and ligand binding: From protein subfamilies to functional specificity. *Proceedings of the National Academy of Sciences*, 107(5), pp.1995–2000.
- Rice, P., Longden, I. & Bleasby, A., 2000. EMBOSS: The European Molecular Biology Open Software Suite. *Trends in Genetics*, 16(1), pp.276–277.
- Sievers, F. et al., 2011. Fast, scalable generation of high-quality protein multiple sequence alignments using Clustal Omega. *Molecular systems biology*, 7(1), p.539.
- Suchard MA, Lemey P, Baele G, Ayres DL, Drummond AJ & Rambaut A. 2018. Bayesian phylogenetic and phylodynamic data integration using BEAST 1.10 *Virus Evolution* 4, vey016.
- Urbanowicz, R.A. et al., 2016. Human Adaptation of Ebola Virus during the West African Outbreak. *Cell*, 167(4), pp.1079–1087.
- Volchkov, V.E. et al., 1995. GP mRNA of Ebola Virus Is Edited by the Ebola Virus Polymerase and by T7 and Vaccinia Virus Polymerases. *Virology*, 214(2), pp.421–430.









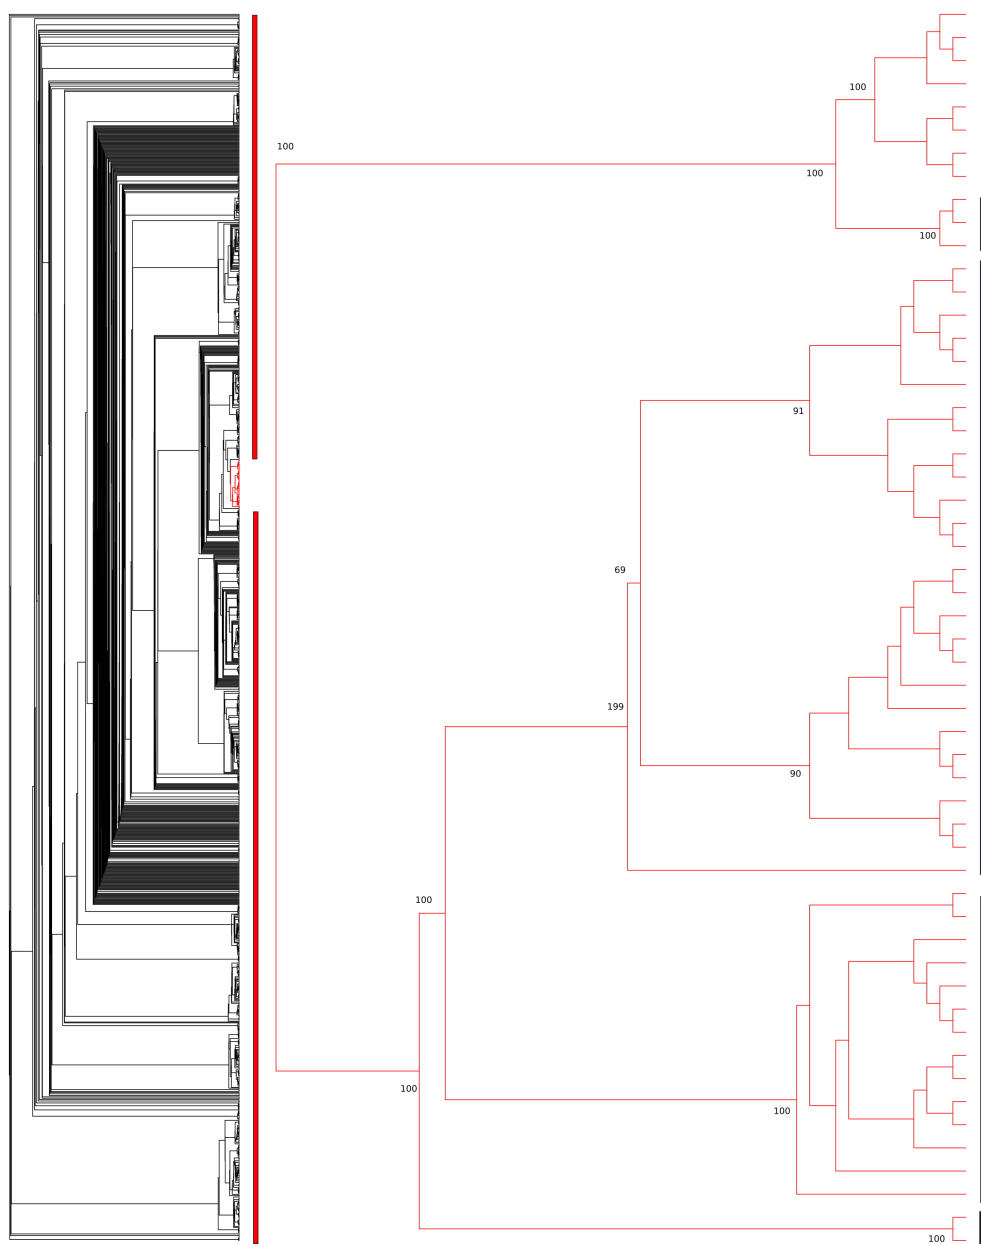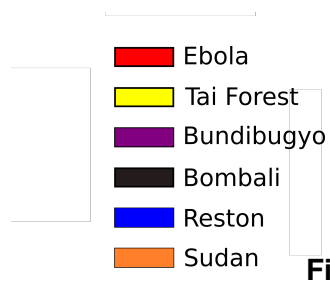

**Fig S1D. L Maximum Likelihood Tree**

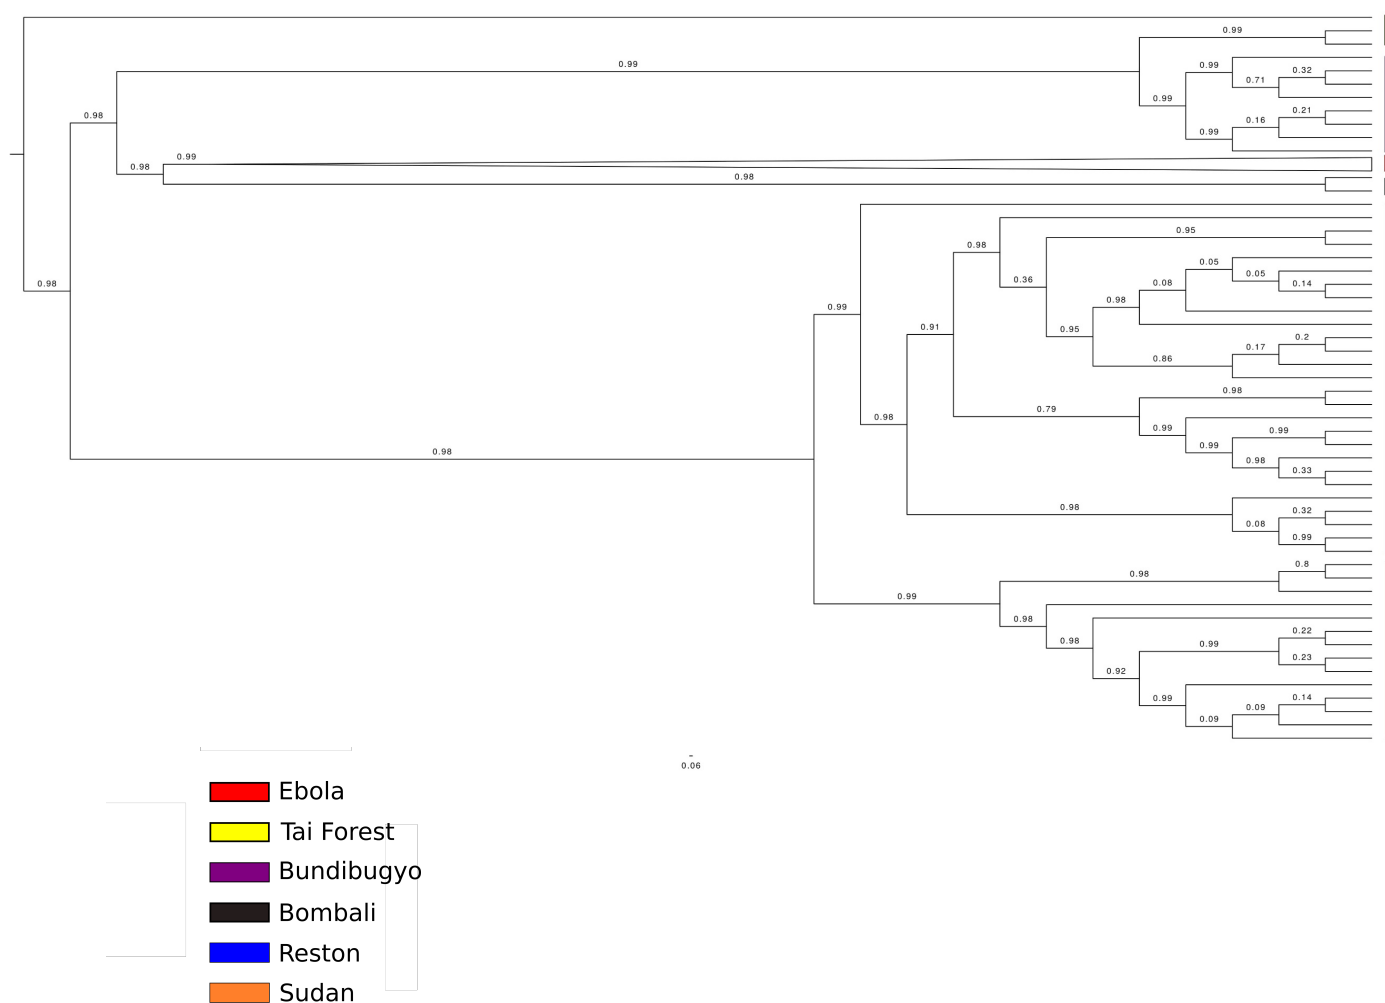

**Fig S1E. GP Bayesian Tree**





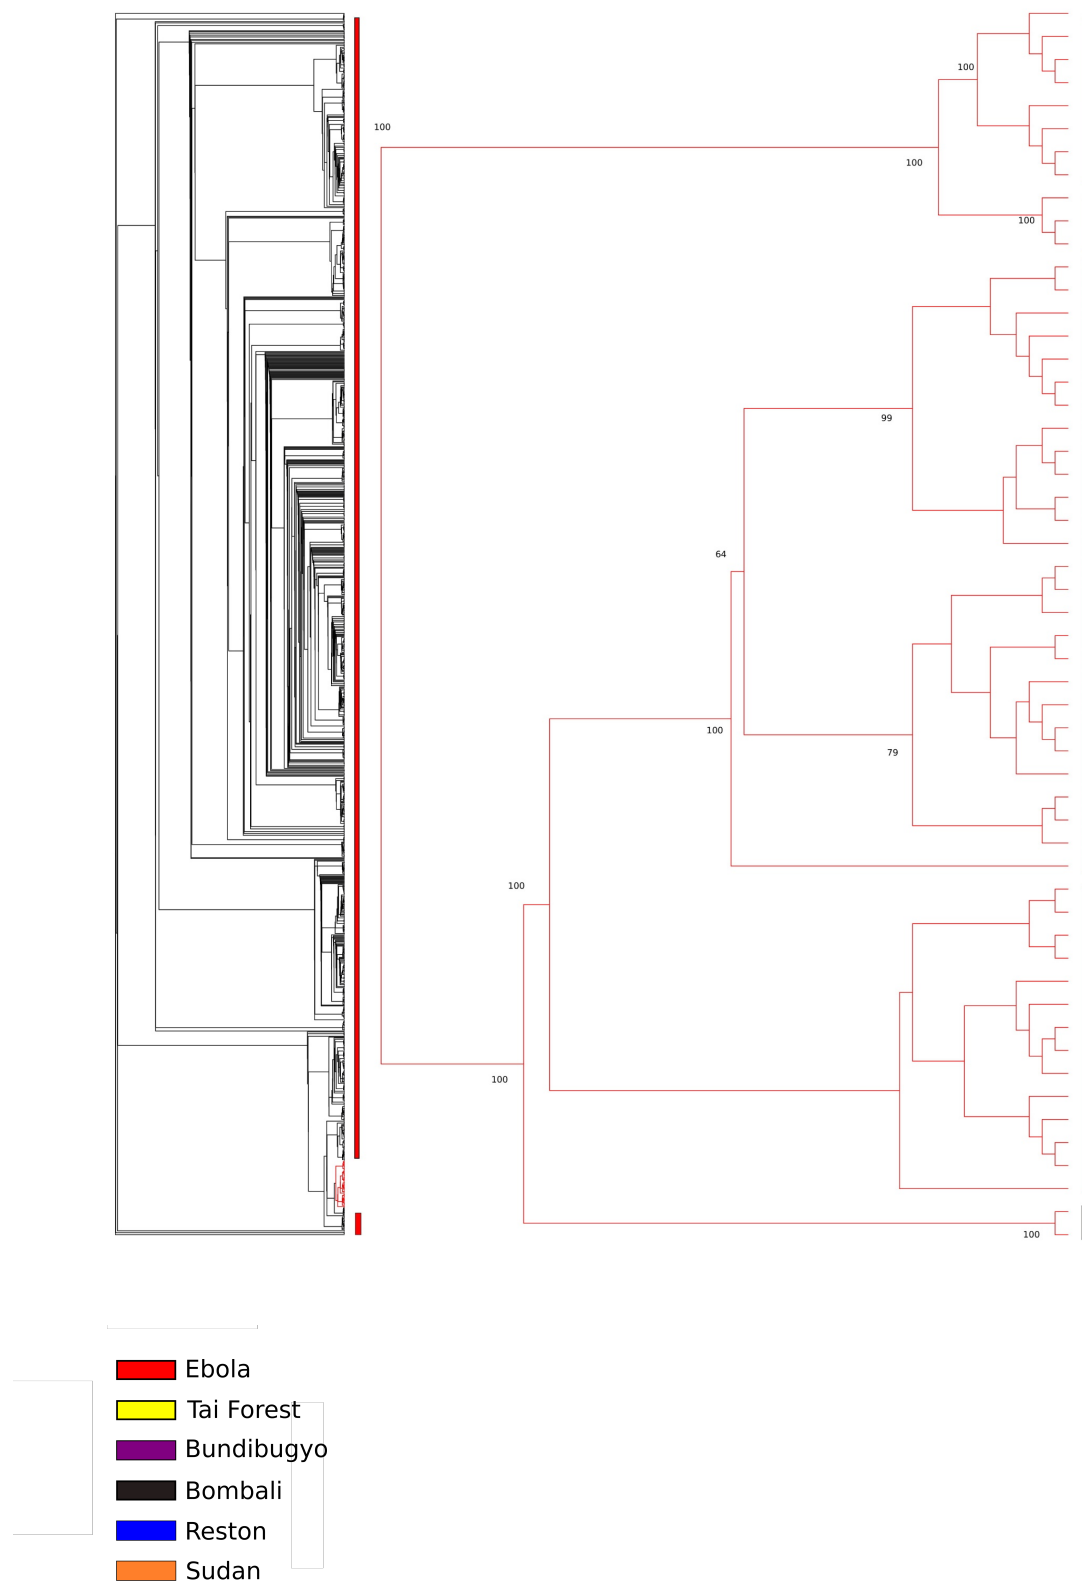

**Fig S1H. NP Maximum Likelihood Tree**



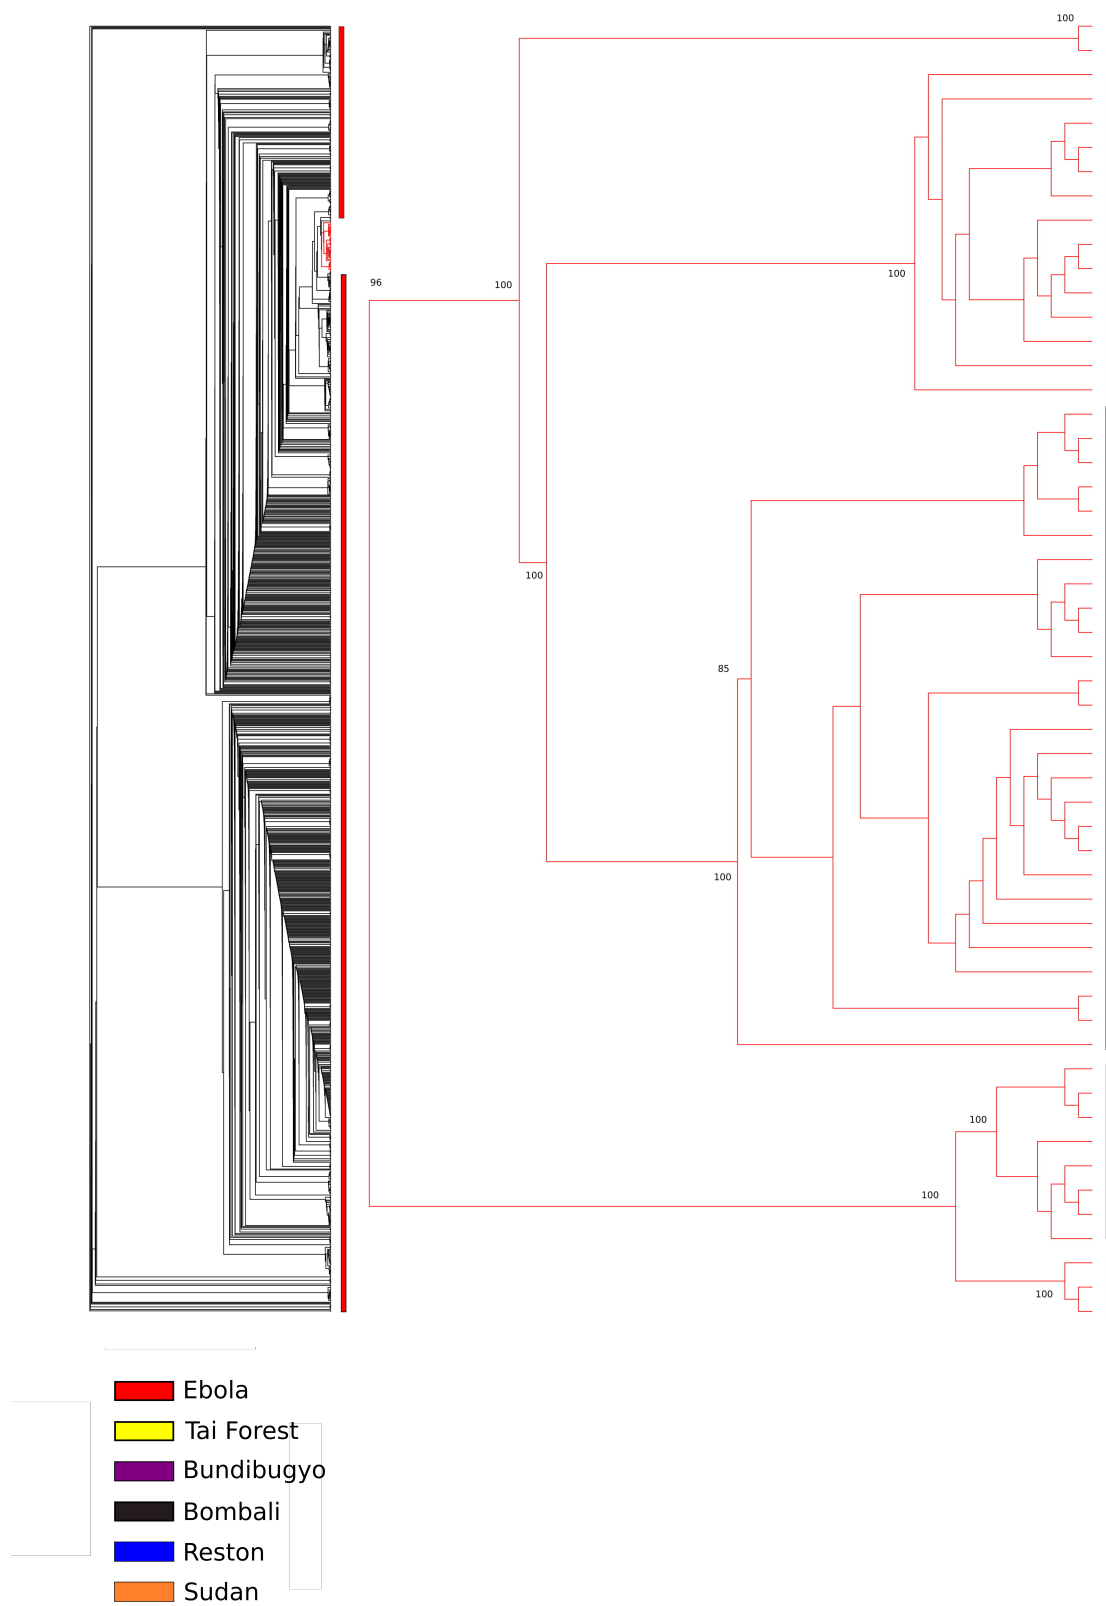

**Fig S1J. VP24 Maximum Likelihood Tree**





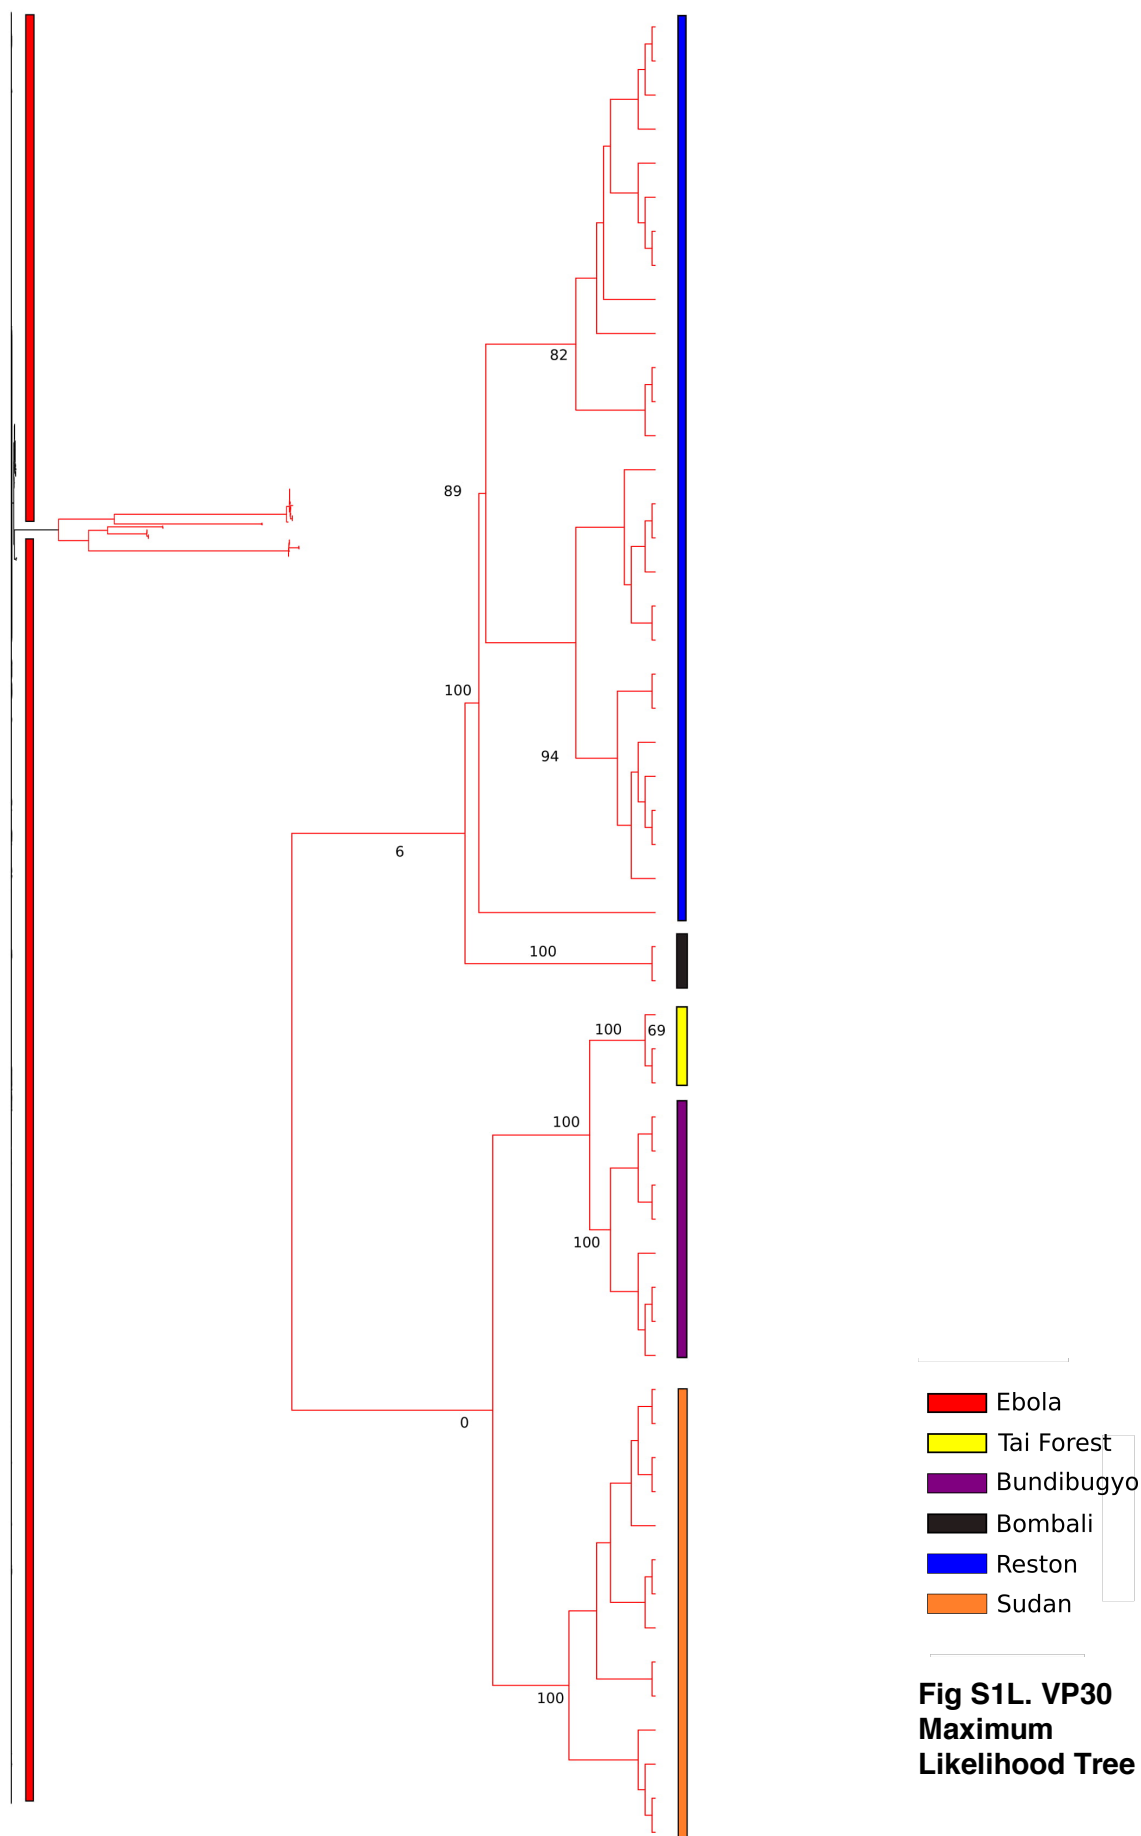



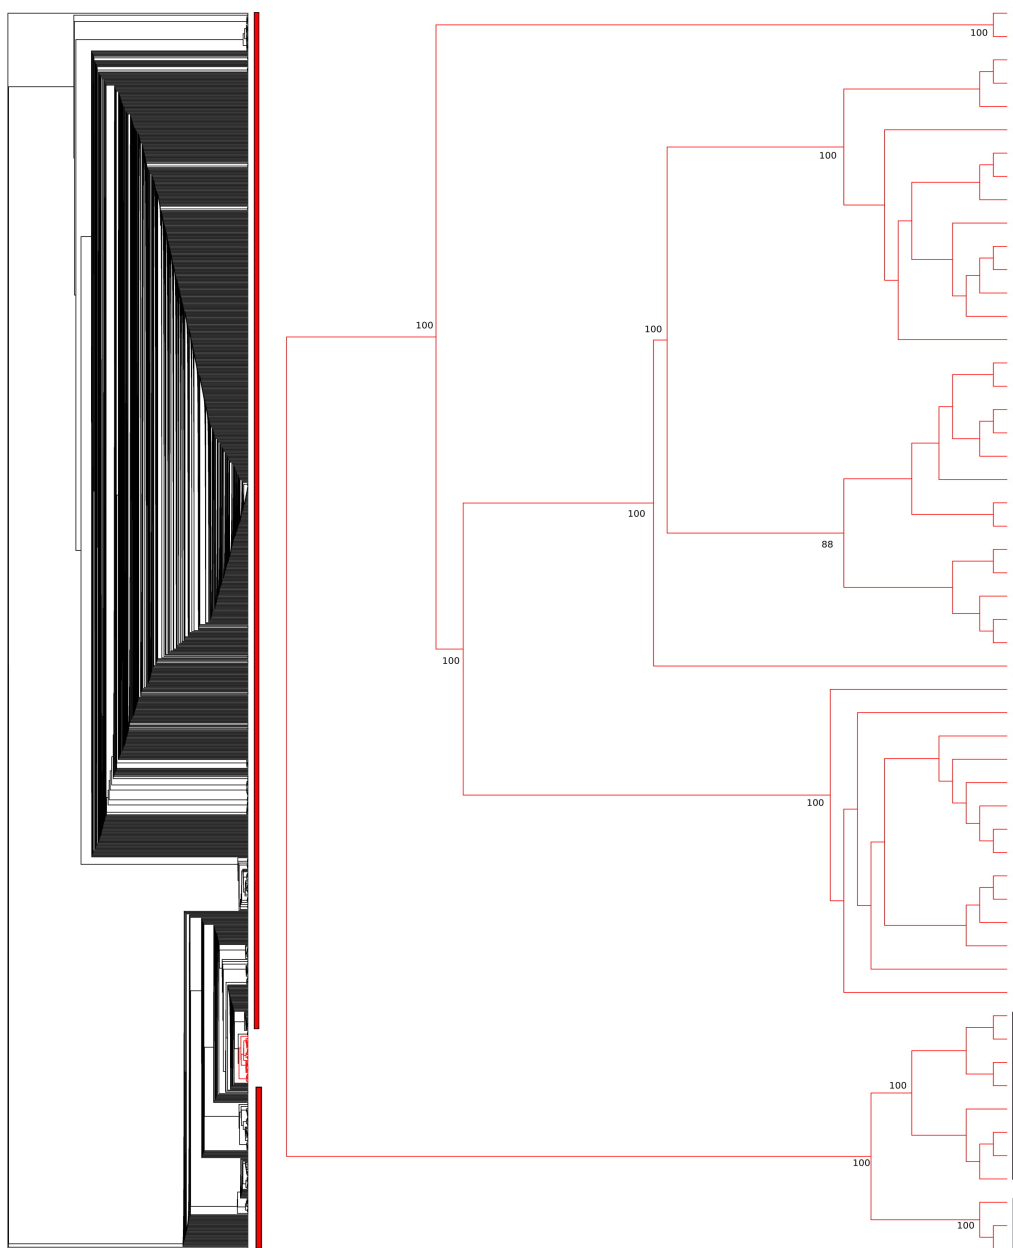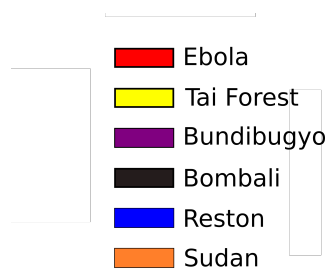

**Fig S1N. VP35 Maximum Likelihood Tree**

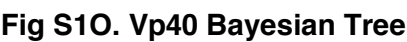

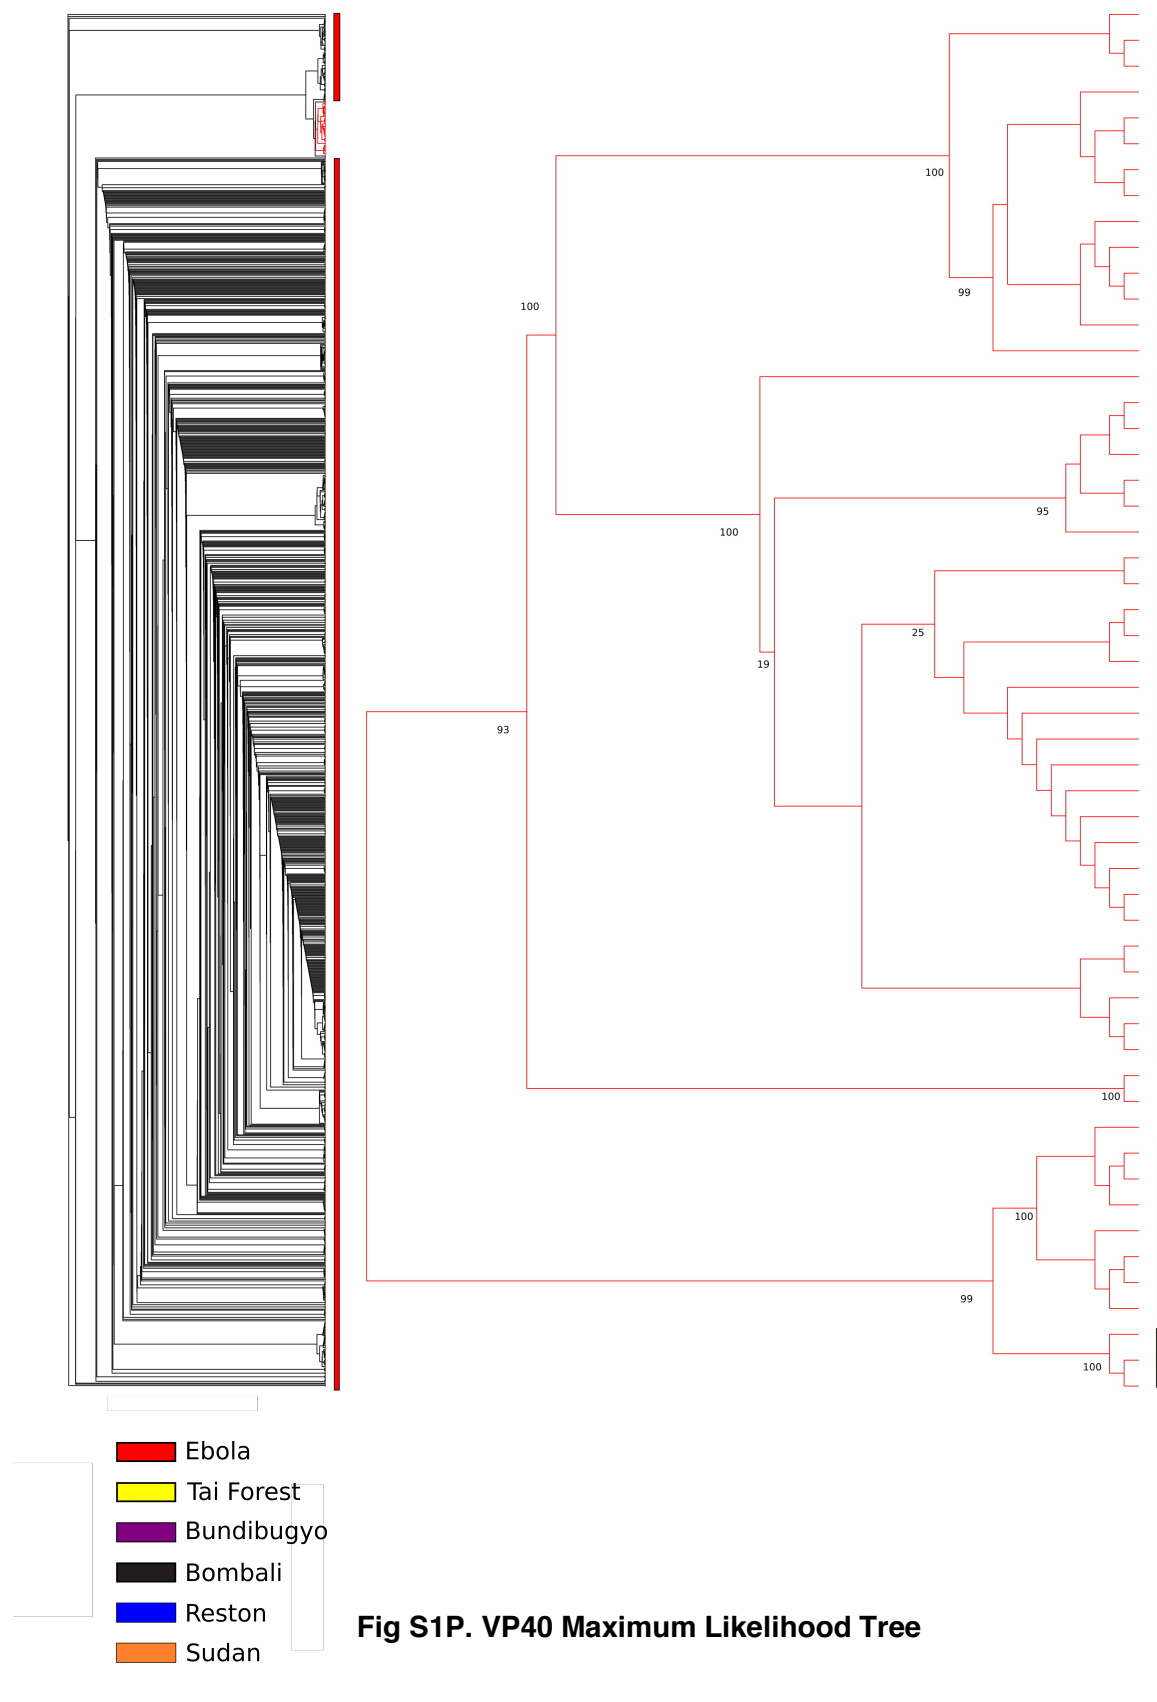

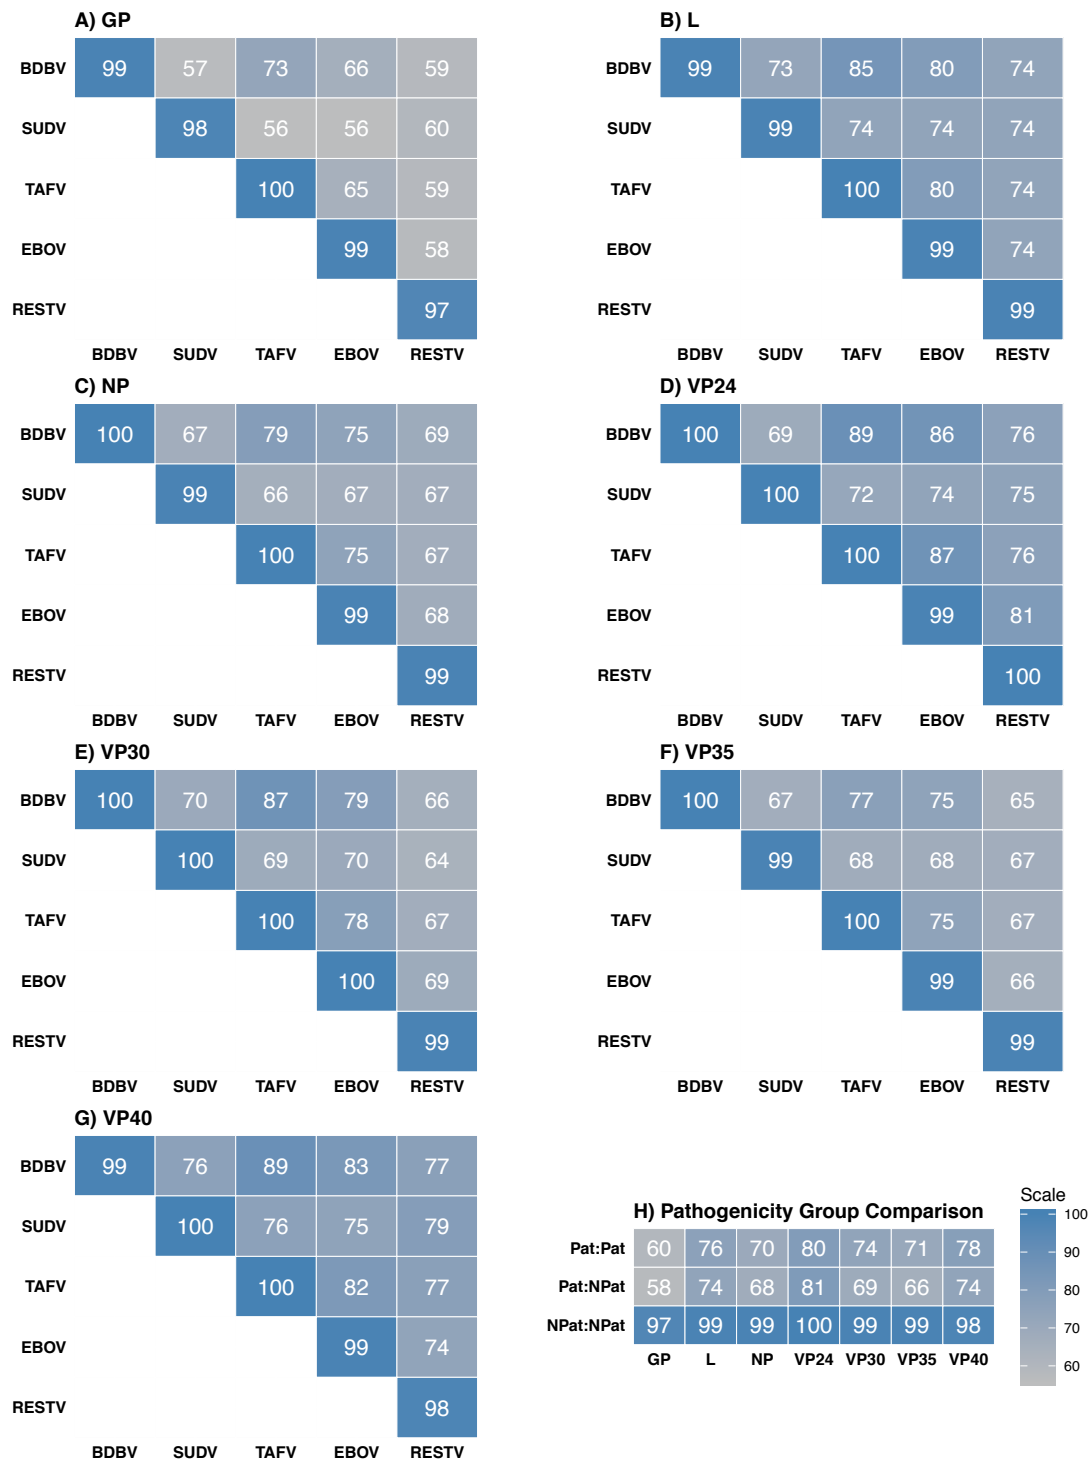

**Supplementary Figure 2:** Intra- and inter-species protein sequence conservation for each of the 7 ebolavirus proteins, and conservation between pathogenic and non-pathogenic groups. **A)** GP gene. **B)** L gene. **C)** NP gene. **D)** VP24 gene. **E)** VP30 gene. **F)** VP35 gene. **G)** VP40 gene. **H)** Comparison of pathogenicity groups for all 7 proteins.

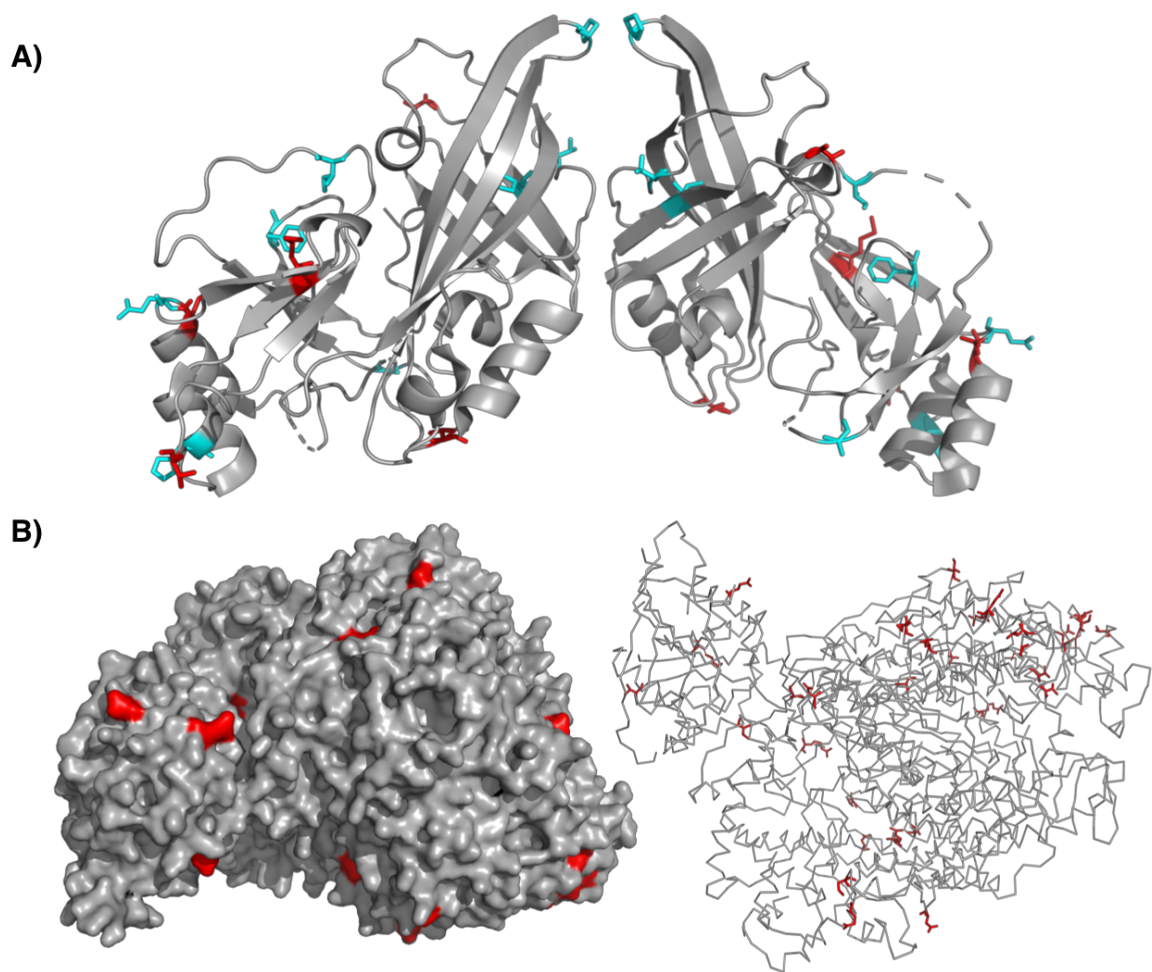

**Supplementary Figure 3:** SDPs mapped to VP40 and L. **A)** SDPs identified in VP40 – VP40 is shown in cartoon format and coloured grey, SDPs are shown in stick format with retained SDPs coloured cyan and gained SDPs coloured red. **B)** SDPs mapped to the Phyre2 structure of L, shown as a surface representation and as a ribbon representation – L is shown in grey and SDPs are shown in red.



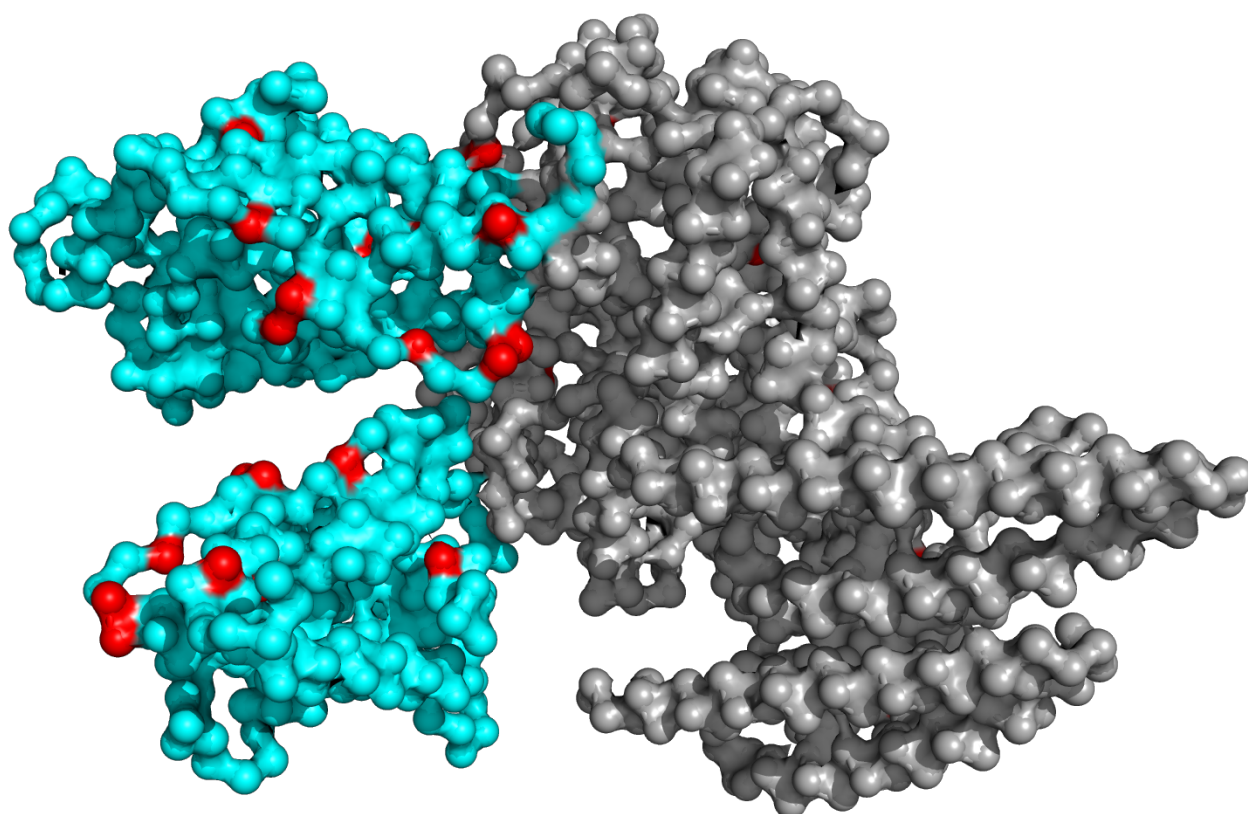

**Supplementary Figure 4:** Model of the *Ebola virus* nucleocapsid subunit from recombinant virus-like particles using Cryo-EM (resolution 7.3 angstroms) featuring VP24 (cyan) and Nucleoprotein (grey). SDPs are shown in red.

## Supplementary Tables

**Supplementary Table 1:** SDPs identified for the gene GP. For each species the amino acid residue at the alignment position is given followed by the sequence position, e.g. A1 for Alanine at sequence position 1, and the number of samples with this amino acid is given in brackets after. Where there is more than one amino acid at a position for a species these are separated by semi-colons. A 'Lost' status indicates the SDP was only found in the original analysis, a 'Retained' status indicates that the SDP was found in the old and new analysis, and a 'Gained' status indicates that the SDP is only found in the new analysis.

| Alignment Position | EBOV             | SUDV    | BDBV   | TAFV   | RESTV   | BOMV | EBOV REF | Status   |
|--------------------|------------------|---------|--------|--------|---------|------|----------|----------|
| 2                  | M1(1356)         | M1(14)  | M1(8)  | M1(3)  | G2(27)  | N/A  | M1       | Retained |
| 32                 | F31(1355);S31(1) | F31(14) | F31(8) | F31(3) | I32(27) | V27  | F31      | Retained |
| 38                 | V37(1356)        | V37(14) | V37(8) | V37(3) | I38(27) | V33  | V37      | Retained |
| 46                 | V45(1356)        | V45(14) | V45(8) | V45(3) | A46(27) | V41  | V45      | Retained |
| 76                 | V75(1349);A75(7) | V75(14) | V75(8) | V75(3) | I76(27) | I71  | V75      | Retained |

|     |                                                    |                  |         |             |          |      |      |          |
|-----|----------------------------------------------------|------------------|---------|-------------|----------|------|------|----------|
| 197 | S196(13<br>56)                                     | S196(14<br>)     | S196(8) | S196(<br>3) | A197(27) | P192 | S196 | Retained |
| 261 | I260(13<br>56)                                     | I260(14)         | I260(8) | I260(3)     | L261(27) | I256 | I260 | Retained |
| 270 | T269(13<br>56)                                     | T269(14<br>)     | T269(8) | T269(3<br>) | S270(27) | T265 | T269 | Retained |
| 308 | X307(1);<br>S307(13<br>55)                         | S307(14<br>)     | S307(8) | S307(<br>3) | H308(27) | S303 | S307 | Retained |
| 497 | X476(4);<br>S476(13<br>52)                         | S476(14<br>)     | S476(8) | L476(3<br>) | P477(27) | I479 | S476 | Gained   |
| 519 | R498(13<br>53);X49<br>8(3)                         | R498(14<br>)     | R498(8) | R498(<br>3) | K499(27) | R494 | R498 | Retained |
| 521 | X500(2);<br>R500(13<br>54)                         | R500(14<br>)     | R500(8) | R500(<br>3) | K501(27) | K496 | R500 | Retained |
| 535 | N514(13<br>54);X51<br>4(2)                         | N514(14<br>)     | N514(8) | N514(<br>3) | D515(27) | N510 | N514 | Retained |
| 542 | X521(1);<br>Q521(1<br>355)                         | Q521(1<br>4)     | Q521(8) | L521(3<br>) | V522(27) | H517 | Q521 | Retained |
| 605 | I584(13<br>56)                                     | I584(14)         | I584(8) | I584(3)     | L585(27) | I580 | I584 | Retained |
| 628 | D607(13<br>54);X60<br>7(2)                         | D607(14<br>)     | D607(8) | D607(<br>3) | S608(27) | D603 | D607 | Retained |
| 643 | X622(1);<br>K622(13<br>55)                         | K622(14<br>)     | K622(8) | K622(<br>3) | E623(27) | R618 | K622 | Retained |
| 659 | Q638(1<br>352);L6<br>38(1);R<br>638(1);X<br>638(2) | Q638(1<br>4)     | Q638(8) | Q638(<br>3) | H639(27) | Q634 | Q638 | Retained |
| 665 | X644(2);<br>W644(1<br>354)                         | W644(1<br>4)     | W644(8) | W644(<br>3) | L645(27) | W640 | W644 | Retained |
| 680 | A659(1);<br>T659(13<br>54);X65<br>9(1)             | T659(14<br>)     | T659(8) | T659(3<br>) | I660(27) | V655 | T659 | Retained |
| 3   | G2(135<br>6)                                       | G2(11);<br>E2(3) | V2(8)   | G2(3)       | S3(27)   | N/A  | G2   | Lost     |
| 208 | X207(57<br>);E207(1<br>299)                        | E207(14<br>)     | T207(8) | T207(3<br>) | D208(27) | N203 | E207 | Lost     |
| 211 | S210(12<br>99);X21<br>0(57)                        | S210(14<br>)     | S210(8) | S210(<br>3) | T211(27) | S206 | S210 | Lost     |
| 326 | R325(13<br>54);X32<br>5(2)                         | R325(14<br>)     | V325(8) | V325(<br>3) | G326(27) | E321 | R325 | Lost     |
| 355 | H354(13<br>56)                                     | H354(14<br>)     | R354(8) | Q354(<br>3) | L355(27) | Q350 | H354 | Lost     |

|     |                                     |          |         |         |                   |      |      |      |
|-----|-------------------------------------|----------|---------|---------|-------------------|------|------|------|
| 417 | X403(10);Q403(1346)                 | S412(14) | A409(8) | T409(3) | E412(27)          | Q397 | Q403 | Lost |
| 432 | S418(1339);X418(15);X417(1);A417(1) | T427(14) | S419(8) | T419(3) | T422(27)          | S412 | S418 | Lost |
| 468 | T448(1345);X448(8);A448(3)          | -(14)    | T451(8) | K451(3) | -(27)             | T438 | T448 | Lost |
| 537 | H516(1355);X516(1)                  | H516(14) | H516(8) | H516(3) | H517(14);Y517(13) | N512 | H516 | Lost |
| 568 | L547(1352);X547(4)                  | L547(14) | I547(8) | I547(3) | V548(27)          | L543 | L547 | Lost |
| 663 | D642(1354);X642(2)                  | D642(14) | D642(8) | S642(3) | L643(27)          | D638 | D642 | Lost |

**Supplementary Table 2:** SDPs identified for the gene L. For each species the amino acid residue at the alignment position is given followed by the sequence position, e.g. A1 for Alanine at sequence position 1, and the number of samples with this amino acid is given in brackets after. Where there is more than one amino acid at a position for a species these are separated by semi-colons. A 'Lost' status indicates the SDP was only found in the original analysis, a 'Retained' status indicates that the SDP was found in the old and new analysis, and a 'Gained' status indicates that the SDP is only found in the new analysis.

| Alignment Position | EBOV                                               | SUDV         | BDBV    | TAFV        | RESTV    | BOMV | EBOV REF | Status   |
|--------------------|----------------------------------------------------|--------------|---------|-------------|----------|------|----------|----------|
| 67                 | V59(1);<br>V66(135<br>5)                           | V67(14)      | V66(8)  | V66(3)      | T66(27)  | V66  | V66      | Retained |
| 137                | I136(13<br>55);I129<br>(1)                         | I137(14)     | I136(8) | I136(3)     | L136(27) | L136 | I136     | Retained |
| 147                | L139(1);<br>L146(13<br>55)                         | L147(14<br>) | L146(8) | L146(3<br>) | V146(27) | L146 | L146     | Retained |
| 203                | T202(13<br>46);S20<br>2(9);T19<br>5(1)             | T203(14<br>) | T202(8) | T202(3<br>) | I202(27) | E202 | T202     | Gained   |
| 222                | A221(13<br>55);A21<br>4(1)                         | A222(14<br>) | A221(8) | A221(3<br>) | S221(27) | A221 | A221     | Retained |
| 224                | Q223(1<br>355);Q2<br>16(1)                         | Q224(1<br>4) | Q223(8) | Q223(3<br>) | L223(27) | Q223 | Q223     | Retained |
| 227                | T219(1);<br>T226(13<br>54);A22<br>6(1)             | T227(14<br>) | T226(8) | T226(3<br>) | S226(27) | K226 | T226     | Gained   |
| 228                | H227(13<br>55);H22<br>0(1)                         | H228(14<br>) | H227(8) | H227(3<br>) | Q227(27) | Y227 | H227     | Retained |
| 237                | V236(13<br>55);V22<br>9(1)                         | V237(14<br>) | V236(8) | V236(3<br>) | I236(27) | V236 | V236     | Gained   |
| 284                | L283(13<br>55);L27<br>6(1)                         | L284(14<br>) | L283(8) | L283(3<br>) | V283(27) | L283 | L283     | Retained |
| 331                | T323(1);<br>T330(13<br>55)                         | T331(14<br>) | T330(8) | T330(3<br>) | D330(27) | T330 | T330     | Retained |
| 351                | E343(1);<br>E350(13<br>55)                         | E351(14<br>) | E350(8) | E350(3<br>) | D350(27) | E350 | E350     | Retained |
| 362                | M361(1)<br>;T361(1<br>353);T3<br>54(1);X3<br>61(1) | T362(14<br>) | T361(8) | T361(3<br>) | S361(27) | T361 | T361     | Retained |
| 366                | L358(1);<br>L365(13<br>54);X36<br>5(1)             | L366(14<br>) | L365(8) | L365(3<br>) | F365(27) | F365 | L365     | Retained |

|      |                            |           |          |          |           |       |       |          |
|------|----------------------------|-----------|----------|----------|-----------|-------|-------|----------|
| 380  | V379(1353);V372(1);X379(2) | V380(14)  | V379(8)  | V379(3)  | I379(27)  | I379  | V379  | Retained |
| 448  | X447(4);Q447(1351);Q440(1) | Q448(14)  | Q447(8)  | Q447(3)  | H447(27)  | Q447  | Q447  | Retained |
| 451  | P450(1351);P443(1);X450(4) | P451(14)  | P450(8)  | P450(3)  | S450(27)  | P450  | P450  | Retained |
| 466  | D465(1355);D458(1)         | D466(14)  | D465(8)  | D465(3)  | N465(27)  | D465  | D465  | Retained |
| 848  | X847(1);S847(1354);S840(1) | S848(14)  | S847(8)  | S847(3)  | A847(27)  | S847  | S847  | Retained |
| 869  | S861(1);S868(1355)         | S869(14)  | S868(8)  | S868(3)  | A868(27)  | S868  | S868  | Retained |
| 1025 | T1017(1);T1024(1355)       | T1025(14) | T1024(8) | T1024(3) | N1024(27) | N1024 | T1024 | Retained |
| 1074 | R1066(1);R1073(1355)       | R1074(14) | R1073(8) | R1073(3) | K1073(27) | R1073 | R1073 | Retained |
| 1120 | A1112(1);A1119(1355)       | A1120(14) | A1119(8) | A1119(3) | S1119(27) | A1119 | A1119 | Retained |
| 1164 | P1156(1);P1163(1355)       | P1162(14) | P1163(8) | P1163(3) | A1161(27) | P1163 | P1163 | Retained |
| 1190 | D1189(1355);D1182(1)       | D1188(14) | D1189(8) | D1189(3) | S1187(27) | D1189 | D1189 | Retained |
| 1215 | A1214(1355);A1207(1)       | A1213(14) | A1214(8) | A1214(3) | S1212(27) | A1214 | A1214 | Retained |
| 1218 | R1210(1);R1217(1355)       | R1216(14) | R1217(8) | R1217(3) | K1215(27) | R1217 | R1217 | Retained |
| 1238 | D1237(1355);D1230(1)       | D1236(14) | D1237(8) | D1237(3) | E1235(27) | D1237 | D1237 | Retained |
| 1355 | R1354(1355);R1347(1)       | R1353(14) | R1354(8) | R1354(3) | K1352(27) | R1354 | R1354 | Retained |
| 1367 | T1359(1);T1366(1355)       | T1365(14) | T1366(8) | T1366(3) | A1364(27) | T1366 | T1366 | Retained |
| 1409 | I1408(1355);I1401(1)       | I1407(14) | I1408(8) | I1408(3) | M1406(27) | I1408 | I1408 | Retained |

|      |                                           |               |              |              |                            |       |       |          |
|------|-------------------------------------------|---------------|--------------|--------------|----------------------------|-------|-------|----------|
| 1415 | I1407(1)<br>;I1414(1<br>355)              | I1413(1<br>4) | I1414(8)     | I1414(<br>3) | L1412(27)                  | I1414 | I1414 | Retained |
| 1437 | S1429(1<br>);S1436(<br>1355)              | S1435(1<br>4) | S1436(8<br>) | S1436<br>(3) | N1434(27<br>)              | S1436 | S1436 | Retained |
| 1474 | S1466(1<br>);X1473(<br>2);S147<br>3(1353) | S1472(1<br>4) | S1473(8<br>) | S1473<br>(3) | C1471(27<br>)              | S1473 | S1473 | Retained |
| 1489 | L1488(1<br>355);L1<br>481(1)              | L1487(1<br>4) | L1488(8<br>) | L1488(<br>3) | Y1486(27<br>)              | I1488 | L1488 | Retained |
| 1500 | I1499(1<br>355);I14<br>92(1)              | I1498(1<br>4) | I1499(8)     | I1499(<br>3) | L1497(27)                  | I1499 | I1499 | Retained |
| 1507 | S1506(1<br>355);S1<br>499(1)              | S1505(1<br>4) | S1506(8<br>) | S1506<br>(3) | A1504(27<br>)              | S1506 | S1506 | Retained |
| 1510 | I1509(1<br>355);I15<br>02(1)              | I1508(1<br>4) | I1509(8)     | I1509(<br>3) | V1507(27<br>)              | V1509 | I1509 | Retained |
| 1627 | L1617(1<br>);L1624(<br>1355)              | L1623(1<br>4) | L1624(8<br>) | L1624(<br>3) | Y1624(27<br>)              | L1624 | L1624 | Retained |
| 1631 | C1628(1<br>355);C1<br>621(1)              | C1627(1<br>4) | C1628(8<br>) | C1628<br>(3) | S1628(27<br>)              | C1638 | C1628 | Retained |
| 1786 | V1755(1<br>);V1762(<br>1355)              | V1759(1<br>4) | V1762(8<br>) | V1762<br>(3) | I1760(27)                  | V1760 | V1762 | Retained |
| 1874 | V1843(1<br>);V1850(<br>1355)              | V1847(1<br>4) | V1850(8<br>) | V1850<br>(3) | T1848(27<br>)              | T1848 | V1850 | Retained |
| 1897 | I1873(1)<br>;T1866(<br>1);T187<br>3(1354) | T1870(1<br>4) | T1873(8<br>) | T1873(<br>3) | S1871(27<br>)              | T1871 | T1873 | Retained |
| 1941 | R1909(1<br>);R1916<br>(1355)              | R1913(1<br>4) | R1916(8<br>) | R1916<br>(3) | N1915(3);<br>N1914(24<br>) | R1914 | R1916 | Retained |
| 1966 | E1941(1<br>354);X1<br>941(1);E<br>1934(1) | E1938(1<br>4) | E1941(8<br>) | E1941<br>(3) | R1939(24<br>);R1940(3<br>) | E1939 | E1941 | Retained |
| 2069 | L2044(1<br>355);L2<br>037(1)              | L2041(1<br>4) | L2044(8<br>) | L2044(<br>3) | I2043(3);I<br>2042(24)     | L2044 | L2044 | Retained |
| 2102 | S2077(1<br>355);S2<br>070(1)              | S2074(1<br>4) | S2077(8<br>) | S2077<br>(3) | T2075(24<br>);T2076(3<br>) | S2075 | S2077 | Retained |
| 2123 | E2091(1<br>);E2098(<br>1355)              | E2095(1<br>4) | E2098(8<br>) | E2098<br>(3) | D2096(24<br>);D2097(3<br>) | E2096 | E2098 | Retained |
| 2182 | L2157(1<br>353);X2                        | L2154(1<br>4) | L2157(8<br>) | L2157(<br>3) | V2155(24<br>);V2156(3<br>) | L2155 | L2157 | Retained |

|      |                                               |               |              |              |                            |       |       |          |
|------|-----------------------------------------------|---------------|--------------|--------------|----------------------------|-------|-------|----------|
|      | 157(2);L<br>2150(1)                           |               |              |              |                            |       |       |          |
| 2193 | R2168(1<br>355);R2<br>161(1)                  | R2165(1<br>4) | R2168(8<br>) | R2168<br>(3) | H2167(3);<br>H2166(24<br>) | K2166 | R2168 | Retained |
| 2200 | R2168(1<br>);R2175<br>(1355)                  | R2172(1<br>4) | R2175(8<br>) | R2175<br>(3) | K2173(24<br>);K2174(3<br>) | R2173 | R2175 | Retained |
| 2202 | X2177(1<br>);L2177(<br>1354);L<br>2170(1)     | L2174(1<br>4) | L2177(8<br>) | L2177(<br>3) | F2175(24<br>);F2176(3<br>) | W2175 | L2177 | Retained |
| 2211 | X2186(2<br>);M2179<br>(1);M21<br>86(1353<br>) | M2183(<br>14) | M2186(<br>8) | M2186<br>(3) | L2185(3);<br>L2184(24)     | M2184 | M2186 | Retained |
| 110  | Q109(1<br>298);X1<br>09(57);<br>Q102(1)       | Q110(1<br>4)  | Q109(8)      | Q109(<br>3)  | R109(2);<br>H109(25)       | Q109  | Q109  | Lost     |
| 277  | L276(13<br>55);X26<br>9(1)                    | L277(14<br>)  | L276(8)      | L276(3<br>)  | I276(27)                   | L276  | L276  | Lost     |
| 313  | Y312(13<br>54);X30<br>5(1);X31<br>2(1)        | Y313(14<br>)  | Y312(8)      | Y312(<br>3)  | F312(27)                   | Y312  | Y312  | Lost     |
| 327  | A319(1);<br>X326(1);<br>A326(13<br>54)        | A327(14<br>)  | A326(8)      | A326(<br>3)  | S326(27)                   | A326  | A326  | Lost     |
| 690  | E689(13<br>53);E68<br>2(1);X68<br>9(2)        | E690(14<br>)  | E689(8)      | E689(<br>3)  | S689(27)                   | E689  | E689  | Lost     |
| 897  | X896(58<br>);F896(1<br>297);F8<br>89(1)       | F897(14<br>)  | F896(8)      | F896(3<br>)  | Y896(27)                   | F896  | F896  | Lost     |
| 926  | L925(13<br>52);X92<br>5(3);L91<br>8(1)        | L926(14<br>)  | L925(8)      | L925(3<br>)  | F925(27)                   | L925  | L925  | Lost     |
| 955  | X954(2);<br>A954(13<br>53);A94<br>7(1)        | A955(14<br>)  | A954(8)      | A954(<br>3)  | S954(27)                   | A954  | A954  | Lost     |
| 996  | X995(2);<br>S995(13<br>53);S98<br>8(1)        | S996(14<br>)  | S995(8)      | S995(<br>3)  | T995(27)                   | S995  | S995  | Lost     |
| 1256 | V1255(1<br>);I1248(<br>1);I1255<br>(1354)     | I1254(1<br>4) | I1255(8)     | I1255(<br>3) | V1253(27<br>)              | I1255 | I1255 | Lost     |

|      |                                        |           |          |          |                    |       |       |      |
|------|----------------------------------------|-----------|----------|----------|--------------------|-------|-------|------|
| 1396 | A1395(1);S1395(1353);S1388(1);X1395(1) | S1394(14) | S1395(8) | S1395(3) | T1393(27)          | T1395 | S1395 | Lost |
| 1462 | X1461(1);K1454(1);K1461(1354)          | K1460(14) | K1461(8) | K1461(3) | Q1459(27)          | I1461 | K1461 | Lost |
| 1539 | X1538(1);A1538(1354);A1531(1)          | A1537(14) | A1538(8) | A1538(3) | S1536(27)          | A1538 | A1538 | Lost |
| 2033 | X2008(57);L2001(1);L2008(1298)         | L2005(14) | L2008(8) | L2008(3) | I2007(3);I2006(24) | L2006 | L2008 | Lost |
| 2130 | X2105(2);Q2098(1);Q2105(1353)          | Q2102(14) | Q2105(8) | Q2105(3) | L2104(3);L2103(24) | Q2103 | Q2105 | Lost |
| 2133 | Q2108(1353);Q2101(1);X2108(2)          | Q2105(14) | Q2108(8) | Q2108(3) | E2107(3);E2106(24) | Q2106 | Q2108 | Lost |
| 2156 | Y2124(1);Y2131(1354);X2131(1)          | Y2128(14) | Y2131(8) | Y2131(3) | F2129(24);F2130(3) | Y2129 | Y2131 | Lost |



**Supplementary Table 3:** SDPs identified for the gene NP. For each species the amino acid residue at the alignment position is given followed by the sequence position, e.g. A1 for Alanine at sequence position 1, and the number of samples with this amino acid is given in brackets after. Where there is more than one amino acid at a position for a species these are separated by semi-colons. A 'Lost' status indicates the SDP was only found in the original analysis, a 'Retained' status indicates that the SDP was found in the old and new analysis, and a 'Gained' status indicates that the SDP is only found in the new analysis.

| Alignment Position | EBOV                   | SUDV     | BDBV    | TAFV    | RESTV    | BOMV | EBOV REF | Status   |
|--------------------|------------------------|----------|---------|---------|----------|------|----------|----------|
| 4                  | R4(1356)               | R4(14)   | R4(8)   | R4(3)   | G4(27)   | R4   | R4       | Retained |
| 16                 | X16(1);<br>E16(1355)   | E16(14)  | E16(8)  | G16(3)  | D16(27)  | D16  | E16      | Retained |
| 30                 | S30(1356)              | S30(14)  | S30(8)  | S30(3)  | T30(27)  | S30  | S30      | Retained |
| 39                 | R39(1356)              | R39(14)  | R39(8)  | R39(3)  | K39(27)  | R39  | R39      | Retained |
| 56                 | I56(1356)              | I56(14)  | I56(8)  | I56(3)  | V56(27)  | I56  | I56      | Retained |
| 64                 | V64(1356)              | V64(14)  | V64(8)  | V64(3)  | I64(27)  | V64  | V64      | Retained |
| 105                | R105(1354);X105(2)     | R105(14) | R105(8) | R105(3) | K105(27) | R105 | R105     | Retained |
| 137                | M137(1354);X137(2)     | M137(14) | M137(8) | M137(3) | L137(27) | M137 | M137     | Retained |
| 212                | X212(1);<br>F212(1355) | F212(14) | F212(8) | F212(3) | Y212(27) | F212 | F212     | Retained |
| 274                | K274(1355);X274(1)     | K274(14) | K274(8) | K274(3) | R274(27) | R274 | K274     | Retained |
| 279                | X279(1);<br>S279(1355) | S279(14) | S279(8) | S279(3) | A279(27) | S279 | S279     | Retained |
| 416                | X416(1);<br>K416(1355) | K416(14) | K416(8) | K416(3) | N416(27) | R416 | K416     | Retained |
| 421                | X421(1);<br>Y421(1355) | Y421(14) | Y421(8) | Y421(3) | Q421(27) | Y421 | Y421     | Retained |
| 426                | D426(1356)             | D426(14) | D426(8) | D426(3) | E426(27) | E426 | D426     | Retained |
| 435                | D435(1356)             | D435(14) | D435(8) | D435(3) | N435(27) | D435 | D435     | Retained |
| 443                | D443(1356)             | D443(14) | D443(8) | D443(3) | E443(27) | V443 | D443     | Retained |
| 453                | T453(1356)             | T453(14) | T453(8) | T453(3) | I453(27) | T453 | T453     | Retained |
| 497                | P497(1316);S497(40)    | P497(14) | P497(8) | R497(3) | A497(27) | S497 | P497     | Retained |
| 571                | T563(1348);X56         | T563(14) | T563(8) | T563(3) | S563(27) | A563 | T563     | Retained |

|     |                                        |              |                     |             |                      |                     |      |          |
|-----|----------------------------------------|--------------|---------------------|-------------|----------------------|---------------------|------|----------|
|     | 3(7);--<br>(1)                         |              |                     |             |                      |                     |      |          |
| 573 | --<br>(1);X565<br>(7);I565(<br>1348)   | I565(14)     | I565(8)             | I565(3)     | V565(27)             | I565                | I565 | Retained |
| 610 | X602(24<br>);P602(1<br>332)            | P602(14<br>) | P602(8)             | N602(<br>3) | T602(27)             | R602                | P602 | Retained |
| 650 | X641(5);<br>N641(13<br>51)             | N641(14<br>) | N641(8)             | K641(<br>3) | Q641(27)             | S641                | N641 | Retained |
| 714 | A705(13<br>56)                         | A705(14<br>) | A705(8)             | A705(<br>3) | R705(27)             | A705                | A705 | Retained |
| 726 | G717(1<br>354);X7<br>17(2)             | G717(1<br>4) | G717(8)             | D717(<br>3) | N717(27)             | G717                | G717 | Retained |
| 42  | Q42(9);<br>S42(1);<br>P42(134<br>6)    | P42(14)      | P42(8)              | Q42(3)      | S42(27)              | P42                 | P42  | Lost     |
| 374 | R374(1)<br>;K374(1<br>355)             | K374(14<br>) | K374(8)             | K374(<br>3) | R374(27)             | E374                | K374 | Lost     |
| 492 | X492(57<br>);D492(<br>1299)            | D492(14<br>) | D492(8)             | D492(<br>3) | E492(27)             | E492                | D492 | Lost     |
| 530 | P526(13<br>56)                         | V526(14<br>) | G524(4)<br>;S524(4) | N524(<br>3) | V530(1);A<br>530(26) | P526(1);<br>L526(1) | P526 | Lost     |
| 725 | D716(13<br>54);N71<br>6(1);X71<br>6(1) | D716(14<br>) | D716(8)             | D716(<br>3) | N716(27)             | D716                | D716 | Lost     |

**Supplementary Table 4:** SDPs identified for the gene VP24. For each species the amino acid residue at the alignment position is given followed by the sequence position, e.g. A1 for Alanine at sequence position 1, and the number of samples with this amino acid is given in brackets after. Where there is more than one amino acid at a position for a species these are separated by semi-colons. A 'Lost' status indicates the SDP was only found in the original analysis, a 'Retained' status indicates that the SDP was found in the old and new analysis, and a 'Gained' status indicates that the SDP is only found in the new analysis.

| Alignment Position | EBOV                | SUDV     | BDBV    | TAFV    | RESTV    | BOMV            | EBOV REF | Status   |
|--------------------|---------------------|----------|---------|---------|----------|-----------------|----------|----------|
| 17                 | X17(1);L17(1355)    | L17(14)  | L17(8)  | L17(3)  | M17(27)  | L17             | L17      | Retained |
| 22                 | X22(1);V22(1355)    | V22(14)  | V22(8)  | V22(3)  | I22(27)  | V22             | V22      | Retained |
| 31                 | V31(1356)           | V31(14)  | V31(8)  | V31(3)  | I31(27)  | V31             | V31      | Retained |
| 102                | I102(1354);V102(2)  | I102(14) | I102(8) | I102(3) | L102(27) | I102            | I102     | Gained   |
| 131                | T131(1356)          | T131(14) | T131(8) | T131(3) | S131(27) | T131            | T131     | Retained |
| 132                | N132(1356)          | N132(14) | N132(8) | N132(3) | T132(27) | A132            | N132     | Retained |
| 136                | I136(15);M136(1341) | M136(14) | M136(8) | M136(3) | L136(27) | L136            | M136     | Retained |
| 139                | Q139(1356)          | Q139(14) | Q139(8) | Q139(3) | R139(27) | R139            | Q139     | Retained |
| 140                | R140(1356)          | R140(14) | H140(8) | Q140(3) | S140(27) | R140(1);S140(1) | R140     | Gained   |
| 226                | X226(4);T226(1352)  | T226(14) | T226(8) | T226(3) | A226(27) | T226            | T226     | Retained |
| 248                | S248(1356)          | S248(14) | S248(8) | S248(3) | L248(27) | S248            | S248     | Retained |

**Supplementary Table 5:** SDPs identified for the gene VP30. For each species the amino acid residue at the alignment position is given followed by the sequence position, e.g. A1 for Alanine at sequence position 1, and the number of samples with this amino acid is given in brackets after. Where there is more than one amino acid at a position for a species these are separated by semi-colons. A 'Lost' status indicates the SDP was only found in the original analysis, a 'Retained' status indicates that the SDP was found in the old and new analysis, and a 'Gained' status indicates that the SDP is only found in the new analysis.

| Alignment Position | EBOV                                | SUDV         | BDBV    | TAFV    | RESTV    | BOMV | EBOV REF | Status   |
|--------------------|-------------------------------------|--------------|---------|---------|----------|------|----------|----------|
| 40                 | H39(2);<br>X39(1);<br>Y39(135<br>3) | Y39(14)      | Y39(8)  | Y39(3)  | R40(27)  | N50  | Y39      | Gained   |
| 53                 | X52(1);<br>T52(135<br>5)            | T52(14)      | T52(8)  | T52(3)  | N53(27)  | V63  | T52      | Retained |
| 54                 | X53(1);<br>V53(135<br>5)            | V53(14)      | V53(8)  | V53(3)  | L54(27)  | M64  | V53      | Retained |
| 64                 | X63(3);<br>T63(135<br>3)            | T63(14)      | T63(8)  | T63(3)  | I64(27)  | L74  | T63      | Retained |
| 94                 | E93(135<br>6)                       | E93(14)      | E93(8)  | E93(3)  | D94(27)  | E104 | E93      | Retained |
| 97                 | T96(135<br>5);X96(1<br>)            | T96(14)      | T96(8)  | T96(3)  | N97(27)  | T107 | T96      | Retained |
| 99                 | R98(135<br>5);X98(1<br>)            | R98(14)      | R98(8)  | R98(3)  | H99(27)  | R109 | R98      | Retained |
| 108                | K107(13<br>54);X10<br>7(2)          | K107(14<br>) | K107(8) | K107(3) | R108(27) | K118 | K107     | Retained |
| 112                | S111(13<br>56)                      | S111(14<br>) | S111(8) | S111(3) | I112(27) | L122 | S111     | Retained |
| 117                | X116(1);<br>L116(13<br>55)          | L116(14<br>) | L116(8) | L116(3) | S117(27) | V127 | L116     | Retained |
| 118                | N117(13<br>56)                      | N117(14<br>) | N117(8) | S117(3) | Q118(27) | C128 | N117     | Gained   |
| 121                | A120(13<br>56)                      | A120(14<br>) | A120(8) | A120(3) | S121(27) | A131 | A120     | Retained |
| 151                | T150(13<br>55);X15<br>0(1)          | T150(14<br>) | T150(8) | T150(3) | I151(27) | I161 | T150     | Retained |
| 158                | X157(1);<br>Q157(1<br>355)          | Q157(1<br>4) | Q157(8) | Q157(3) | R158(27) | K168 | Q157     | Retained |
| 160                | X159(1);<br>I159(13<br>55)          | I159(14)     | I159(8) | I159(3) | L160(27) | L170 | I159     | Retained |
| 206                | E205(13<br>56)                      | E205(14<br>) | E205(8) | E205(3) | D206(27) | E216 | E205     | Retained |
| 263                | R262(13<br>56)                      | R262(14<br>) | R262(8) | R262(3) | A263(27) | K273 | R262     | Retained |

|     |                                        |              |         |         |          |      |      |          |
|-----|----------------------------------------|--------------|---------|---------|----------|------|------|----------|
| 269 | S268(13<br>56)                         | S268(14<br>) | S268(8) | S268(3) | Q269(27) | A279 | S268 | Retained |
| 272 | E271(13<br>56)                         | E271(14<br>) | T271(8) | T271(3) | S272(27) | N282 | E271 | Gained   |
| 279 | X278(1);<br>G278(1<br>355)             | G278(1<br>4) | E278(8) | E278(3) | N279(27) | T289 | G278 | Gained   |
| 197 | H196(1)<br>;R196(1<br>354);X1<br>96(1) | R196(14<br>) | R196(8) | R196(3) | H197(27) | R207 | R196 | Lost     |

**Supplementary Table 6:** SDPs identified for the gene VP35. For each species the amino acid residue at the alignment position is given followed by the sequence position, e.g. A1 for Alanine at sequence position 1, and the number of samples with this amino acid is given in brackets after. Where there is more than one amino acid at a position for a species these are separated by semi-colons. A 'Lost' status indicates the SDP was only found in the original analysis, a 'Retained' status indicates that the SDP was found in the old and new analysis, and a 'Gained' status indicates that the SDP is only found in the new analysis.

| Alignment Position | EBOV                                                                   | SUDV    | BDBV    | TAFV        | RESTV   | BOMV | EBOV REF | Status   |
|--------------------|------------------------------------------------------------------------|---------|---------|-------------|---------|------|----------|----------|
| 59                 | X26(1);<br>S7(1);S<br>59(2);S2<br>6(1352)                              | S15(14) | S27(8)  | S27(3)      | T15(27) | S27  | S26      | Retained |
| 81                 | E81(2);<br>E48(135<br>3);E29(1<br>)                                    | E37(14) | E49(8)  | E49(3)      | D37(27) | D49  | E48      | Retained |
| 109                | G76(3);<br>X76(1);<br>D76(134<br>9);D109<br>(2);D57(<br>1)             | D65(14) | D77(8)  | D77(3)      | E65(27) | D77  | D76      | Retained |
| 117                | X117(1);<br>E65(1);<br>E84(134<br>6);E117(<br>1);G84(<br>1);X84(6<br>) | E73(14) | A85(8)  | E85(3)      | K73(27) | D85  | E84      | Gained   |
| 118                | X85(7);<br>D85(1);<br>X118(1);<br>E66(1);<br>E85(134<br>5);E118(<br>1) | E74(14) | E86(8)  | D86(3)      | K74(27) | E86  | E85      | Retained |
| 125                | S92(134<br>8);X92(5<br>);S73(1)<br>;S125(1)<br>;X125(1)                | S81(14) | S93(8)  | S93(3)      | M81(27) | S93  | S92      | Retained |
| 130                | V130(2);<br>V97(135<br>0);V78(1<br>);X97(3)                            | V86(14) | V98(8)  | I98(3)      | T86(27) | V98  | V97      | Retained |
| 134                | T101(13<br>51);X10<br>1(2);T13<br>4(2);T82<br>(1)                      | T90(14) | T102(8) | A102(<br>3) | N90(27) | A102 | T101     | Retained |
| 139                | S106(13<br>52);S87(<br>1);X106(<br>1);S139(<br>2)                      | S95(14) | S107(8) | S107(<br>3) | A95(27) | S107 | S106     | Retained |

|     |                                                                |                          |         |             |          |      |      |          |
|-----|----------------------------------------------------------------|--------------------------|---------|-------------|----------|------|------|----------|
| 145 | T112(13<br>52);T14<br>5(2);T93<br>(1);X112<br>(1)              | A101(3);<br>T101(11<br>) | T113(8) | I113(3)     | S101(27) | S113 | T112 | Gained   |
| 154 | V154(2);<br>X121(2);<br>V102(1);<br>V121(13<br>51)             | V110(14<br>)             | V122(8) | M122(<br>3) | I110(27) | V122 | V121 | Retained |
| 158 | A106(1);<br>V125(1);<br>A158(2);<br>A125(13<br>52)             | A114(14<br>)             | T126(8) | A126(<br>3) | G114(27) | A126 | A125 | Gained   |
| 187 | A154(13<br>53);A13<br>5(1);A18<br>7(2)                         | A143(14<br>)             | A155(8) | A155(<br>3) | S143(27) | A155 | A154 | Retained |
| 192 | T140(1);<br>T159(13<br>53);T19<br>2(2)                         | T148(14<br>)             | T160(8) | T160(3<br>) | V148(27) | T160 | T159 | Retained |
| 193 | E141(1);<br>E160(13<br>53);E19<br>3(2)                         | E149(14<br>)             | E161(8) | E161(<br>3) | D149(27) | E161 | E160 | Retained |
| 200 | G200(2)<br>;X167(1)<br>;G148(1<br>);G167(<br>1352)             | G156(1<br>4)             | G168(8) | G168(<br>3) | K156(27) | G168 | G167 | Retained |
| 207 | S207(2);<br>S155(1);<br>S174(13<br>53)                         | S163(14<br>)             | S175(8) | S175(<br>3) | A163(27) | S175 | S174 | Retained |
| 214 | I181(13<br>53);I162<br>(1);I214(<br>2)                         | I170(14)                 | I182(8) | I182(3)     | L170(27) | I182 | I181 | Retained |
| 302 | X269(2);<br>E269(13<br>51);E30<br>2(1);X30<br>2(1);E25<br>0(1) | E258(14<br>)             | E270(8) | E270(<br>3) | D258(27) | D270 | E269 | Retained |
| 323 | A323(2);<br>A271(1);<br>X290(3);<br>A290(13<br>50)             | A279(14<br>)             | A291(8) | A291(<br>3) | V279(27) | I291 | A290 | Retained |
| 347 | X314(3);<br>V314(13<br>50);V29<br>5(1);V34<br>7(2)             | V303(14<br>)             | V315(8) | V315(<br>3) | A303(27) | V315 | V314 | Retained |

|     |                                                              |              |         |             |          |      |      |          |
|-----|--------------------------------------------------------------|--------------|---------|-------------|----------|------|------|----------|
| 362 | Q329(1<br>351);Q3<br>62(2);--<br>(1);Q31<br>0(1);X32<br>9(1) | Q318(1<br>4) | Q330(8) | Q330(<br>3) | K318(27) | Q330 | Q329 | Retained |
|-----|--------------------------------------------------------------|--------------|---------|-------------|----------|------|------|----------|



**Supplementary Table 7:** SDPs identified for the gene VP40. For each species the amino acid residue at the alignment position is given followed by the sequence position, e.g. A1 for Alanine at sequence position 1, and the number of samples with this amino acid is given in brackets after. Where there is more than one amino acid at a position for a species these are separated by semi-colons. A 'Lost' status indicates the SDP was only found in the original analysis, a 'Retained' status indicates that the SDP was found in the old and new analysis, and a 'Gained' status indicates that the SDP is only found in the new analysis.

| Alignment Position | EBOV                               | SUDV             | BDBV    | TAFV    | RESTV    | BOMV          | EBOV REF | Status   |
|--------------------|------------------------------------|------------------|---------|---------|----------|---------------|----------|----------|
| 4                  | X4(5);V4(1348);<br>--<br>(2);I4(1) | V4(14)           | A4(8)   | I4(3)   | G4(27)   | T4            | V4       | Gained   |
| 46                 | I46(1);T33(2);T46(1353)            | T46(14)          | T46(8)  | T46(3)  | V46(27)  | I46(1);T46(1) | T46      | Retained |
| 85                 | P85(1352);P72(2);X85(2)            | P85(14)          | P85(8)  | P85(3)  | T85(27)  | P85           | P85      | Retained |
| 105                | T92(2);T105(1352);X105(2)          | M105(1);T105(13) | T105(8) | T105(3) | I105(27) | K105          | T105     | Gained   |
| 122                | X122(3);I122(1351);I109(2)         | I122(14)         | I122(8) | I122(3) | V122(27) | I122          | I122     | Retained |
| 128                | X128(1);A128(1353);A115(2)         | A128(14)         | T128(8) | T128(3) | I128(27) | T128          | A128     | Gained   |
| 201                | G201(1353);G188(2);X201(1)         | G201(14)         | G201(8) | G201(3) | N201(27) | N201          | G201     | Retained |
| 209                | F196(2);X209(3);F209(1351)         | F209(14)         | F209(8) | F209(3) | L209(27) | F209          | F209     | Retained |
| 244                | L244(1354);L231(2)                 | M244(14)         | L244(8) | L244(3) | I244(27) | L244          | L244     | Gained   |
| 245                | Q245(1353);Q232(2);X245(1)         | Q245(14)         | Q245(8) | Q245(3) | P245(27) | Q245          | Q245     | Retained |
| 259                | M246(2);X259(1);M259(1353)         | I259(14)         | M259(8) | M259(3) | V259(27) | V259          | M259     | Gained   |
| 269                | R269(1);X269(1);H256(2);H269(1352) | H269(14)         | H269(8) | H269(3) | Q269(27) | Q269          | H269     | Retained |

|     |                                                    |              |         |         |          |      |      |          |
|-----|----------------------------------------------------|--------------|---------|---------|----------|------|------|----------|
| 277 | T264(2);<br>T277(13<br>54)                         | S277(14<br>) | T277(8) | T277(3) | Q277(27) | H277 | T277 | Gained   |
| 293 | I280(2);I<br>293(135<br>3);X293(<br>1)             | I293(14)     | I293(8) | I293(3) | V293(27) | I293 | I293 | Retained |
| 323 | V310(2);<br>M323(1)<br>;A323(1)<br>;V323(1<br>352) | L323(14<br>) | V323(8) | V323(3) | H323(27) | A323 | V323 | Gained   |
| 325 | E312(2);<br>E325(13<br>54)                         | E325(14<br>) | E325(8) | E325(3) | D325(27) | E325 | E325 | Retained |

**Supplementary Table 8.** Codon variation for each SDP residue of the non-pathogenic species (Reston virus). Only the 10 SDPs that showed any codon variation are included. All variants are synonymous.

| <b>Protein</b> | <b>SDP</b> | <b>Codons Present</b> | <b>Variant Type</b> |
|----------------|------------|-----------------------|---------------------|
| GP             | S196A      | GCT:26, GCC:1         | Synonymous          |
| GP             | T659I      | ATT:26, ATC:1         | Synonymous          |
| L              | L1488Y     | TAT:14, TAC:13        | Synonymous          |
| L              | I1509V     | GTT:26, GTC:1         | Synonymous          |
| L              | L2157V     | GTG:14, GTT:13        | Synonymous          |
| NP             | M137L      | CTG:22, TTG:5         | Synonymous          |
| NP             | K274R      | CGT:26, CGC:1         | Synonymous          |
| VP30           | T63I       | ATA:26, ATT:1         | Synonymous          |
| VP35           | S174A      | GCG:21, GCA:6         | Synonymous          |
| VP35           | I181L      | CTT:22, CTA:5         | Synonymous          |

**Supplementary Table 9.** Codons present for each SDP residue of each pathogenic species, alongside information about non-synonymous variants for GP. Highlighted in yellow are the codons that are 100% conserved across all pathogenic species.

| SDP   | Ebola (1356)                       | Sudan (14)           | Bundibugyo (8)      | Tai Forest (3) | Non-Synonymous? | Notes                                                                                                                       |
|-------|------------------------------------|----------------------|---------------------|----------------|-----------------|-----------------------------------------------------------------------------------------------------------------------------|
| M1G   | ATG                                | ATG                  | ATG                 | ATG            |                 |                                                                                                                             |
| F31I  | TTT (1349),<br>TTC (6),<br>TCT (1) | TTT                  | TTC                 | TTT            | Yes             | All residues are F across all species except 1 Ebola sequence which has an S (TCT)                                          |
| V37I  | GTT (1302),<br>GTC (54)            | GTT                  | GTA                 | GTT            |                 |                                                                                                                             |
| V45A  | GTT                                | GTA                  | GTA                 | GTG            |                 |                                                                                                                             |
| V75I  | GTG (1349),<br>GCG (7)             | GTA                  | GTT                 | GTA            | Yes             | All residues are V across all species except 7 Ebola sequences which have an A (GCG)                                        |
| S196A | TCA                                | TCA                  | TCA (4),<br>TCG (4) | TCT            |                 |                                                                                                                             |
| I260L | ATA                                | ATT                  | ATT                 | ATC            |                 |                                                                                                                             |
| T269S | ACC                                | ACA (13),<br>ACC (1) | ACC                 | ACA            |                 |                                                                                                                             |
| S307H | TCT                                | TCT                  | TCT                 | TCT            |                 |                                                                                                                             |
| S476P | AGC                                | TCC                  | TCT                 | CTC            | Yes             | All Ebola, Sudan and Bundibugyo sequences have an S residue, Tai Forest has an L                                            |
| R498K | AGG (1299),<br>AGA (54)            | CGC                  | AGA                 | AGA            |                 |                                                                                                                             |
| R500K | CGA                                | AGA                  | CGG (4),<br>CGC (4) | CGA            |                 |                                                                                                                             |
| N514D | AAT (1345),<br>AAC (9)             | AAC                  | AAC                 | AAC            |                 |                                                                                                                             |
| Q521V | CAG                                | CAA                  | CAA                 | TTG            | Yes             | All Ebola, Sudan and Bundibugyo sequences have a Q residue, Tai Forest has an L                                             |
| I584L | ATC                                | ATA                  | ATA                 | ATA            |                 |                                                                                                                             |
| D607S | GAC                                | GAT                  | GAT                 | GAT            |                 |                                                                                                                             |
| K622E | AAA                                | AAA                  | AAA                 | AAA            |                 |                                                                                                                             |
| Q638H | CAG (1352),<br>CGG (1),<br>CTG (1) | CAG                  | CAA                 | CAG            | Yes             | All residues are Q across all species except two variants in the Ebola sequences, one producing an R and one producing an L |
| W644L | TGG                                | TGG                  | TGG                 | TGG            |                 |                                                                                                                             |
| T659I | ACA (1354),<br>GCA (1)             | ACT                  | ACG                 | ACA            | Yes             | All residues are T across all species except 1 Ebola sequence which has an A (GCA)                                          |

**Supplementary Table 10.** Codons present for each SDP residue of each pathogenic species, alongside information about non-synonymous variants for L. Highlighted in yellow are the codons that are 100% conserved across all pathogenic species.

| SDP    | Ebola (1356)                  | Sudan (14)        | Bundibugyo (8) | Tai Forest (3) | Non-Synonymous? | Notes                                                                                                          |
|--------|-------------------------------|-------------------|----------------|----------------|-----------------|----------------------------------------------------------------------------------------------------------------|
| V66T   | GTA                           | GTC               | GTT            | GTG            |                 |                                                                                                                |
| I136L  | ATC                           | ATT               | ATT            | ATT            |                 |                                                                                                                |
| L146V  | TTA                           | CTA (11), TTA (3) | CTG            | TTA            |                 |                                                                                                                |
| T202I  | ACA (1346), TCA (9), ACG (1)  | ACA               | ACA            | ACA            | Yes             | 9 Ebola Residues have a TCA codon (S) while all other sequences across all species have codons for a T residue |
| A221S  | GCG (1349), GCA (7)           | GCT               | GCG            | GCT            |                 |                                                                                                                |
| Q223L  | CAA                           | CAA               | CAA            | CAA            |                 |                                                                                                                |
| T226S  | ACA (1355), GCA (1)           | ACA               | ACA            | ACA            | Yes             | All residues are T across all species except 1 Ebola sequence which has an A (GCA)                             |
| H227Q  | CAC                           | CAT (13), CAC (1) | CAT            | CAC            |                 |                                                                                                                |
| V236I  | GTC                           | GTC (11), GTT (3) | GTT            | GTC            |                 |                                                                                                                |
| L283V  | TTA (1354), TTG (1), CTA (1)  | CTG (11), TTG (3) | TTA            | TTA            |                 |                                                                                                                |
| T330D  | ACC (1355), ACT (1)           | ACA               | ACA            | ACA            |                 |                                                                                                                |
| E350D  | GAA                           | GAG               | GAA            | GAA            |                 |                                                                                                                |
| T361S  | ACG (1353), ACA (1), ATG (1)  | ACA               | ACA            | ACT            | Yes             | All residues are T across all species except 1 Ebola sequence which has an M (ATG)                             |
| L365F  | CTT                           | TTA               | CTC            | CTC            |                 |                                                                                                                |
| V379I  | GTG                           | GTT               | GTG            | GTC            |                 |                                                                                                                |
| Q447H  | CAA                           | CAA               | CAA            | CAA            |                 |                                                                                                                |
| P450S  | CCG                           | CCA               | CCA            | CCA            |                 |                                                                                                                |
| D465N  | GAC                           | GAT               | GAT            | GAT            |                 |                                                                                                                |
| S847A  | TCC                           | TCA               | TCT            | TCT            |                 |                                                                                                                |
| S868A  | TCG                           | TCT               | TCC            | TCC            |                 |                                                                                                                |
| T1024N | ACT (1341), ACC (14)          | ACG               | ACA            | ACA            |                 |                                                                                                                |
| R1073K | AGA                           | AGG (11), AGA (3) | AGG            | CGA            |                 |                                                                                                                |
| A1119S | GCA (1313), GCT (42), GCG (1) | GCT               | GCA            | GCA            |                 |                                                                                                                |
| P1163A | CCA                           | CCA               | CCA            | CCT            |                 |                                                                                                                |
| D1189S | GAT                           | GAT               | GAC            | GAT            |                 |                                                                                                                |
| A1214S | GCA                           | GCT               | GCT            | GCA            |                 |                                                                                                                |
| R1217K | AGA                           | AGA (11), AGG (3) | CGT            | CGT            |                 |                                                                                                                |
| D1237E | GAC (1353), GAT (3)           | GAT               | GAT            | GAC            |                 |                                                                                                                |
| R1354K | CGG                           | AGG               | CGG            | CGA            |                 |                                                                                                                |
| T1366A | ACA                           | ACG               | ACG            | ACA            |                 |                                                                                                                |
| I1408M | ATT                           | ATT               | ATC            | ATA            |                 |                                                                                                                |
| I1414L | ATT                           | ATA               | ATT            | ATT            |                 |                                                                                                                |
| S1436N | AGC                           | AGT               | AGC            | AGC            |                 |                                                                                                                |

|        |                         |                         |                     |     |     |                                                                                          |
|--------|-------------------------|-------------------------|---------------------|-----|-----|------------------------------------------------------------------------------------------|
| S1473C | AGT                     | AGT                     | AGT                 | AGT |     |                                                                                          |
| L1488Y | CTT                     | CTC (11),<br>CTT (3)    | CTC                 | CTT |     |                                                                                          |
| I1499L | ATA                     | ATC (13),<br>ATT (1)    | ATC                 | ATA |     |                                                                                          |
| S1506A | TCA                     | TCC                     | TCG                 | TCG |     |                                                                                          |
| I1509V | ATA                     | ATC                     | ATA                 | ATC |     |                                                                                          |
| L1624Y | CTT                     | CTA                     | CTA                 | TTA |     |                                                                                          |
| C1628S | TGT                     | TGC                     | TGC                 | TGT |     |                                                                                          |
| V1762I | GTC (1342),<br>GTT (14) | GTA                     | GTC                 | GTA |     |                                                                                          |
| V1850T | GTT                     | GTT                     | GTC (4),<br>GTT (4) | GTA |     |                                                                                          |
| T1873S | ACT (1355),<br>ATT (1)  | ACC                     | ACC                 | ACT | Yes | All residues are T across all species<br>except 1 Ebola sequence which has<br>an I (ATT) |
| R1916N | AGG                     | AGG                     | AGA                 | AGG |     |                                                                                          |
| E1941R | GAA                     | GAA                     | GAG (4),<br>GAA (4) | GAA |     |                                                                                          |
| L2044I | TTA                     | CTT (11),<br>CTC (3)    | TTA                 | CTT |     |                                                                                          |
| S2077T | TCA                     | TCG                     | TCA                 | TCT |     |                                                                                          |
| E2098D | GAA                     | GAG                     | GAA                 | GAG |     |                                                                                          |
| L2157V | TTG                     | CTT                     | TTA                 | CTA |     |                                                                                          |
| R2168H | AGA (1355),<br>AGG (1)  | CGT<br>(11),<br>CGC (3) | AGG                 | CGA |     |                                                                                          |
| R2175K | CGT                     | AGG                     | CGA                 | CGG |     |                                                                                          |
| L2177F | TTA                     | CTG                     | TTA                 | CTA |     |                                                                                          |
| M2186L | ATG                     | ATG                     | ATG                 | ATG |     |                                                                                          |

**Supplementary Table 11.** Codons present for each SDP residue of each pathogenic species, alongside information about non-synonymous variants for NP. Highlighted in yellow are the codons that are 100% conserved across all pathogenic species.

| SDP   | Ebola (1356)            | Sudan (14)           | Bundibugyo (8) | Tai Forest (3) | Non-Synonymous? | Notes                                                                                                                                      |
|-------|-------------------------|----------------------|----------------|----------------|-----------------|--------------------------------------------------------------------------------------------------------------------------------------------|
| R4G   | CGT                     | CGG                  | CGT            | CGG            |                 |                                                                                                                                            |
| E16D  | GAA                     | GAA (11),<br>GAG (3) | GAA            | GGT            | Yes             | All Ebola, Sudan and Bundibugyo sequences have an E residue, Tai Forest has a G                                                            |
| S30T  | TCC                     | TCG (11),<br>TCA (3) | TCC            | TCA            |                 |                                                                                                                                            |
| R39K  | AGA                     | AGA                  | AGA            | CGG            |                 |                                                                                                                                            |
| I56V  | ATC                     | ATC                  | ATC            | ATC            |                 |                                                                                                                                            |
| V64I  | GTT                     | GTA                  | GTC            | GTT            |                 |                                                                                                                                            |
| R105K | CGT                     | AGG                  | CGT            | CGC            |                 |                                                                                                                                            |
| M137L | ATG                     | ATG                  | ATG            | ATG            |                 |                                                                                                                                            |
| F212Y | TTT                     | TTC (11),<br>TTT (3) | TTC            | TTC            |                 |                                                                                                                                            |
| K274R | AAA                     | AAG                  | AAA            | AAG            |                 |                                                                                                                                            |
| S279A | TCC                     | TCA                  | TCT            | TCC            |                 |                                                                                                                                            |
| K416N | AAA                     | AAG                  | AAA            | AAG            |                 |                                                                                                                                            |
| Y421Q | TAC (1354),<br>TAT (1)  | TAT                  | TAT            | TAT            |                 |                                                                                                                                            |
| D426E | GAC                     | GAT                  | GAC            | GAT            |                 |                                                                                                                                            |
| D435N | GAT                     | GAT                  | GAT            | GAT            |                 |                                                                                                                                            |
| D443E | GAT                     | GAT                  | GAT            | GAC            |                 |                                                                                                                                            |
| T453I | ACT                     | ACT                  | ACA            | ACC            |                 |                                                                                                                                            |
| P497A | CCA (1316),<br>TCA (40) | CCA                  | CCG            | CGA            | Yes             | Tai Forest sequences have an R residue. All other species have codons for a P residue except 40 Ebola sequences which have a TCA codon (S) |
| T563S | ACC (1295),<br>ACA (53) | ACC                  | ACT            | ACT            |                 |                                                                                                                                            |
| I565V | ATC (1323),<br>ATT (25) | ATA                  | ATC            | ATC            |                 |                                                                                                                                            |
| P602T | CCC                     | CCA                  | CCT            | AAT            | Yes             | All Ebola, Sudan and Bundibugyo sequences have a P residue, Tai Forest has an N                                                            |
| N641Q | AAC                     | AAC                  | AAT            | AAA            | Yes             | All Ebola, Sudan and Bundibugyo sequences have an N residue, Tai Forest has a K                                                            |
| A705R | GCC (1314),<br>GCT (42) | GCC                  | GCC            | GCC            |                 |                                                                                                                                            |
| G717N | GGT                     | GGC                  | GGT            | GAT            | Yes             | All Ebola, Sudan and Bundibugyo sequences have a G residue, Tai Forest has a D                                                             |

**Supplementary Table 12.** Codons present for each SDP residue of each pathogenic species, alongside information about non-synonymous variants for VP24. Highlighted in yellow are the codons that are 100% conserved across all pathogenic species.

| SDP   | Ebola (1356)                       | Sudan (14)           | Bundibugyo (8) | Tai Forest (3) | Non-Synonymous? | Notes                                                                                                                                      |
|-------|------------------------------------|----------------------|----------------|----------------|-----------------|--------------------------------------------------------------------------------------------------------------------------------------------|
| L17M  | CTG (1348),<br>CTT (5),<br>CTA (1) | CTA                  | CTC            | CTT            |                 |                                                                                                                                            |
| V22I  | GTC                                | GTG (11),<br>GTA (3) | GTT            | GTT            |                 |                                                                                                                                            |
| V31I  | GTT                                | GTG                  | GTT            | GTG            |                 |                                                                                                                                            |
| I102L | ATA (1354),<br>GTA (2)             | ATT                  | ATT            | ATT            | Yes             | All residues are I across all species except 2 Ebola sequences which have a V (GTA)                                                        |
| T131S | ACT (1355),<br>ACC (1)             | ACT                  | ACA            | ACA            |                 |                                                                                                                                            |
| N132T | AAC                                | AAT                  | AAC            | AAC            |                 |                                                                                                                                            |
| M136L | ATG (1341),<br>ATA (15)            | ATG                  | ATG            | ATG            | Yes             | All residues are M across all species except 15 Ebola sequences which have an I (ATA)                                                      |
| Q139R | CAA                                | CAA                  | CAG            | CAA            |                 |                                                                                                                                            |
| R140S | CGT                                | CGA                  | CAC            | CAG            | Yes             | All Ebola and Sudan have codons for an R residue. All Bundibugyo codons produce an H residue and all Tai Forest codons produce a Q residue |
| T226A | ACA                                | ACA (11),<br>ACC (3) | ACC            | ACC            |                 |                                                                                                                                            |
| S248L | TCT                                | TCT                  | TCC            | TCT            |                 |                                                                                                                                            |



**Supplementary Table 13.** Codons present for each SDP residue of each pathogenic species, alongside information about non-synonymous variants for VP30. Highlighted in yellow are the codons that are 100% conserved across all pathogenic species.

| SDP   | Ebola (1356)                 | Sudan (14)        | Bundibugyo (8) | Tai Forest (3) | Non-Synonymous? | Notes                                                                                                       |
|-------|------------------------------|-------------------|----------------|----------------|-----------------|-------------------------------------------------------------------------------------------------------------|
| Y39R  | TAC (1352), CAC (2), TAT (1) | TAC               | TAT            | TAC            | Yes             | All residues are Y across all species except 2 Ebola sequences which have an H (CAC)                        |
| T52N  | ACT                          | ACG (11), ACA (3) | ACT            | ACT            |                 |                                                                                                             |
| V53L  | GTA (1339), GTG (16)         | GTT (11), GTC (3) | GTG            | GTC            |                 |                                                                                                             |
| T63I  | ACA                          | ACT               | ACA            | ACA            |                 |                                                                                                             |
| E93D  | GAA (1314), GAG (42)         | GAA               | GAA            | GAA            |                 |                                                                                                             |
| T96N  | ACT (1341), ACG (14)         | ACC               | ACA            | ACA            |                 |                                                                                                             |
| R98H  | AGG                          | CGG               | AGG            | AGA            |                 |                                                                                                             |
| K107R | AAG (1354), AAA (1)          | AAG               | AAA            | AAG            |                 |                                                                                                             |
| S111I | TCA                          | TCA               | TCC            | TCC            |                 |                                                                                                             |
| L116S | TTA                          | CTT               | TTG            | CTA            |                 |                                                                                                             |
| N117Q | AAT                          | AAT               | AAC            | AGC            | Yes             | All Ebola, Sudan and Bundibugyo sequences have an N residue, Tai Forest has an S                            |
| A120S | GCA                          | GCT               | GCT            | GCT            |                 |                                                                                                             |
| T150I | ACG (1344), ACA (11)         | ACT               | ACT            | ACA            |                 |                                                                                                             |
| Q157R | CAA                          | CAG               | CAA            | CAG            |                 |                                                                                                             |
| I159L | ATC                          | ATT               | ATC            | ATT            |                 |                                                                                                             |
| E205D | GAA                          | GAA               | GAA            | GAG            |                 |                                                                                                             |
| R262A | AGA                          | CGC               | AGG            | AGA            |                 |                                                                                                             |
| S268Q | TCA (1355), TCG (1)          | AGC               | TCA            | TCG            |                 |                                                                                                             |
| E271S | GAG                          | GAA               | ACC            | ACT            | Yes             | All Ebola and Sudan have codons for an S residue, All Bundibugyo and Tai Forest have codons for a T residue |
| G278N | GGG                          | GGG (11), GGA (3) | GAG            | GAA            | Yes             | All Ebola and Sudan have codons for a G residue, All Bundibugyo and Tai Forest have codons for an E residue |

**Supplementary Table 14.** Codons present for each SDP residue of each pathogenic species, alongside information about non-synonymous variants for VP35. Highlighted in yellow are the codons that are 100% conserved across all pathogenic species.

| SDP   | Ebola (1356)                  | Sudan (14)        | Bundibugyo (8)   | Tai Forest (3) | Non-Synonymous? | Notes                                                                                                                                     |
|-------|-------------------------------|-------------------|------------------|----------------|-----------------|-------------------------------------------------------------------------------------------------------------------------------------------|
| S26T  | TCG                           | TCT               | TCC              | TCA            |                 |                                                                                                                                           |
| E48D  | GAG (1352), GAA (4)           | GAA               | GAA              | GAG            |                 |                                                                                                                                           |
| D76E  | GAC (1346), GGC (3), GAT (6)  | GAT               | GAC              | GAT            | Yes             | All residues are D across all species except 3 Ebola sequences which have a G (GGC)                                                       |
| E84K  | GAG (1348), GGG (1)           | GAA               | GCA              | GAA            | Yes             | All Bundibugyo sequences have an A residue. All Ebola, Sudan and Tai Forest have an E residue except one Ebola sequence which has a G     |
| E85K  | GAG (1347), GAC (1)           | GAA (11), GAG (3) | GAG              | GAC            | Yes             | All Tai Forest and one Ebola sequences have a D residue. All other sequences have codons for an E residue                                 |
| S92M  | TCA                           | TCG               | TCT              | TCA            |                 |                                                                                                                                           |
| V97T  | GTG                           | GTG               | GTA              | ATA            | Yes             | All Ebola, Sudan and Bundibugyo sequences have a V residue, Tai Forest has an I                                                           |
| T101N | ACC (1351), ACT (3)           | ACC               | ACC              | GCT            | Yes             | All Ebola, Sudan and Bundibugyo sequences have a T residue, Tai Forest has an A                                                           |
| S106A | TCA                           | TCA               | TCA              | TCT            |                 |                                                                                                                                           |
| T112S | ACG                           | ACA (11), GCA (3) | ACT (4), ACC (4) | ATA            | Yes             | All Ebola and Bundibugyo have a T residue. All Tai Forest have an I residue. 11 Sudan sequence have a T residue while 3 have an A residue |
| V121I | GTT                           | GTT               | GTG              | ATG            | Yes             | All Ebola, Sudan and Bundibugyo sequences have a V residue, Tai Forest has an M                                                           |
| A125G | GCA (1337), GCT (18), GTA (1) | GCA               | ACC              | GCT            | Yes             | All Bundibugyo sequences have a T residue. All others have an A residue except 1 Ebola sequence which has a V (GTA)                       |
| A154S | GCA                           | GCC               | GCC              | GCC            |                 |                                                                                                                                           |
| T159V | ACT                           | ACA               | ACT              | ACT            |                 |                                                                                                                                           |
| E160D | GAG (1342), GAA (14)          | GAA               | GAA              | GAG            |                 |                                                                                                                                           |
| G167K | GGT                           | GGA               | GGA              | GGA            |                 |                                                                                                                                           |
| S174A | TCA                           | TCA               | TCA              | TCA            |                 |                                                                                                                                           |
| I181L | ATT                           | ATT (11), ATC (3) | ATC              | ATT            |                 |                                                                                                                                           |
| E269D | GAA (1352), GAG (1)           | GAG               | GAA              | GAA            |                 |                                                                                                                                           |
| A290V | GCT                           | GCC               | GCA              | GCC            |                 |                                                                                                                                           |
| V314A | GTC                           | GTC               | GTT              | GTT            |                 |                                                                                                                                           |
| Q329K | CAG                           | CAA               | CAG              | CAA            |                 |                                                                                                                                           |

**Supplementary Table 15.** Codons present for each SDP residue of each pathogenic species, alongside information about non-synonymous variants for VP40. Highlighted in yellow are the codons that are 100% conserved across all pathogenic species.

| SDP   | Ebola (1356)                 | Sudan (14)        | Bundibugyo (8) | Tai Forest (3) | Non-Synonymous? | Notes                                                                                                                                |
|-------|------------------------------|-------------------|----------------|----------------|-----------------|--------------------------------------------------------------------------------------------------------------------------------------|
| V4G   | GTT (1348), ATT (1)          | GTC (11), GTT (3) | GCA            | ATC            | Yes             | All Bundibugyo sequences have an A residue. All Tai Forest have an I. All Ebola and Sudan have a V except one Ebola has an I (ATT)   |
| T46V  | ACT (1355), ATT (1)          | ACA               | ACA            | ACT            | Yes             | All residues are D across all species except 1 Ebola sequence which has an I (ATT)                                                   |
| P85T  | CCC (1348), CCT (6)          | CCC               | CCG            | CCG            |                 |                                                                                                                                      |
| T105I | ACC (1355), ATG (1)          | ACG (11), ACA (3) | ACA            | ACA            | Yes             | All residues are T across all species except 1 Ebola sequence which has an M (ATG)                                                   |
| I122V | ATC                          | ATC               | ATC            | ATC            |                 |                                                                                                                                      |
| A128I | GCA                          | GCC               | ACC            | ACC            | Yes             | All Ebola and Sudan have codons for an A residue, All Bundibugyo and Tai Forest have codons for a T residue                          |
| G201N | GGA                          | GGA               | GGA            | GGC            |                 |                                                                                                                                      |
| F209L | TTT                          | TTT               | TTT            | TTC            |                 |                                                                                                                                      |
| L244I | CTC                          | ATG               | CTC            | CTA            | Yes             | All Ebola, Bundibugyo and Tai Forest have an L residue. All Sudan have an M residue                                                  |
| Q245P | CAG                          | CAA               | CAA            | CAA            |                 |                                                                                                                                      |
| M259V | ATG                          | ATT               | ATG            | ATG            | Yes             | All Ebola, Bundibugyo and Tai Forest have an M residue. All Sudan have an I residue                                                  |
| H269Q | CAC (1354), CGC (1)          | CAC               | CAC            | CAC            | Yes             | All residues are H across all species except 1 Ebola sequence which has an R (CGC)                                                   |
| T277Q | ACT (1355), ACC (1)          | AGT               | ACA            | ACT            | Yes             | All Ebola, Bundibugyo and Tai Forest have a T residue. All Sudan have an S residue                                                   |
| I293V | ATT (1354), ATC (1)          | ATT               | ATT            | ATT            |                 |                                                                                                                                      |
| V323H | GTG (1354), ATG (1), GCG (1) | CTC               | GTC            | GTC            | Yes             | All Sudan have an S residue All others have a T residue except 2 Ebola sequences. One has an M residue (ATG) and one has an A (GCG). |
| E325D | GAG                          | GAA               | GAG            | GAA            |                 |                                                                                                                                      |

**Supplementary Table 16.** Codons present for each SDP residue of each pathogenic species, alongside information about non-synonymous variants for the lost SDPs. Highlighted in yellow are the codons that are 100% conserved across all pathogenic species.

| SDP       | Ebola (1356)                  | Sudan (14)    | Bundibugyo (8) | Tai Forest (3) | Non-Synonymous? | Notes                                                                                                        |
|-----------|-------------------------------|---------------|----------------|----------------|-----------------|--------------------------------------------------------------------------------------------------------------|
| <b>GP</b> |                               |               |                |                |                 |                                                                                                              |
| G2S       | GGT:1343, GGC:13              | GGG:11, GAG:3 | GTT            | GGA            | Yes             | 3 Sudan sequences have an E residue, all Bundibugyo sequences have a V residue, all other sequences have a G |
| E207D     | GAG                           | GAA           | ACA            | ACG            | Yes             | Ebola and Sudan have an E residue, Bundibugyo and Tai Forest have a T                                        |
| S210T     | TCG:1245, TCT:51, TCC:11      | TCA           | TCC            | TCC            |                 |                                                                                                              |
| R325G     | CGA                           | AGA           | GTC            | GTC            | Yes             | Ebola and Sudan have an R residue, Bundibugyo and Tai Forest have a V                                        |
| H354L     | CAC:1355, CAT:1               | CAC           | CGA            | CAA            | Yes             | Ebola and Sudan have an H residue, Bundibugyo has an R and Tai Forest has a Q                                |
| Q403E     | CAA                           | CCA           | CCA            | CCA            | Yes             | Ebola has a Q residue, all other species have a P residue                                                    |
| S418T     | TCC                           | CAC           | CGC            | CAC            | Yes             | Ebola has an S residue, Sudan and Tai Forest have an H residue, Bundibugyo has an R residue                  |
| T448M     | ACC:1345, GCC:3               | ACC           | AGC            | ACC            | Yes             | Sudan has an S residue, all others have a T residue except three Ebola sequences which have an A residue     |
| H516H     | CAT                           | CAC           | CAC            | CAC            |                 |                                                                                                              |
| L547V     | CTA:1323, CTG:29              | CTG:11, CTT:3 | ATA            | ATA            | Yes             | Ebola and Sudan have an L residue, Bundibugyo and Tai Forest have an I                                       |
| D642L     | GAC                           | GAT           | GAC            | AGC            | Yes             | Ebola, Sudan and Bundibugyo have a D residue, Tai Forest has an S                                            |
| <b>L</b>  |                               |               |                |                |                 |                                                                                                              |
| Q109H     | CAA                           | CAG           | CAG            | CAA            |                 |                                                                                                              |
| L276I     | CTT                           | CTG           | CTG            | CTA            |                 |                                                                                                              |
| Y312F     | TAC                           | TAT           | TAC            | TAC            |                 |                                                                                                              |
| A326S     | GCT                           | GCA           | GCC            | GCT            |                 |                                                                                                              |
| E689S     | GAA:1341, GAG:13              | GAG           | GAA            | GAA            |                 |                                                                                                              |
| F896Y     | TTC                           | TTC:11, TTT:3 | TTC            | TTT            |                 |                                                                                                              |
| L925F     | CTA:1350, TTA:3               | TTG:11, CTG:3 | CTT            | CTG            |                 |                                                                                                              |
| A954S     | GCG:1336, GCA:18              | GCA           | GCC            | GCA            |                 |                                                                                                              |
| S995T     | AGT                           | TCG           | AGT            | AGT            |                 |                                                                                                              |
| I1255V    | ATA:1355, GTA:1               | ATT           | ATC            | ATT            | Yes             | All sequences have an I residue except one Ebola sequence which has a V residue                              |
| S1395T    | TCA:1352, TCG:1, TCT:1, GCA:1 | TCG           | TCC            | TCT            | Yes             | All sequences have an S residue except one Ebola sequence which has an A residue                             |
| K1461Q    | AAA:1162, AAG:193             | AAA           | AAG            | AAG            |                 |                                                                                                              |
| A1538S    | GCA                           | GCA           | GCA            | GCT            |                 |                                                                                                              |

|             |                            |     |     |     |     |                                                                                                     |
|-------------|----------------------------|-----|-----|-----|-----|-----------------------------------------------------------------------------------------------------|
| L2008I      | TTA                        | CTT | CTT | CTT |     |                                                                                                     |
| Q2105L      | CAA                        | CAG | CAG | CAA |     |                                                                                                     |
| Q2108E      | CAA                        | CAA | CAA | CAA |     |                                                                                                     |
| Y2131F      | TAT:1340, TAC:15           | TAT | TAC | TAC |     |                                                                                                     |
| <b>NP</b>   |                            |     |     |     |     |                                                                                                     |
| P42S        | CCA:1346, CAA:9,<br>TCA:1  | CCG | CCT | CAA | Yes | Tai Forest sequences have a Q residue, all others have a P except one Ebola sequence which has an S |
| K374R       | AAA:1355, AGA:1            | AAG | AAA | AAG | Yes | All sequences have a K residue except one Ebola sequence which has an R residue                     |
| D492E       | GAC:1270,<br>GAT:29        | GAT | GAT | GAC |     |                                                                                                     |
| P526A       | CCA                        | GTG | GAA | CCG | Yes | Ebola and Tai Forest have a P residue, Sudan has a V residue and Bundibugyo has an E                |
| D716N       | GAT:1353, GAC:1,<br>AAT:1  | GAT | GAT | GAT | Yes | All sequences have a D residue except one Ebola sequence which has an N residue                     |
| <b>VP35</b> |                            |     |     |     |     |                                                                                                     |
| R196H       | CGC:1336,<br>CGT:18, CAC:1 | AGG | CGA | CGA | Yes | All sequences have an R residue except one Ebola sequence which has a H residue                     |

**Supplementary Table 17.** SDPs mapped to known PDB structures or modelled structures. \*There was no available structure or model of L when the previous study was carried out

| <b>Protein</b> | <b>Total SDPs</b> | <b>Old Mapped</b> | <b>New Mapped</b> | <b>Total Mapped</b> |
|----------------|-------------------|-------------------|-------------------|---------------------|
| <b>VP24</b>    | 11                | 8                 | 2                 | 10                  |
| <b>VP30</b>    | 20                | 5                 | 0                 | 5                   |
| <b>VP35</b>    | 22                | 4                 | 11                | 15                  |
| <b>VP40</b>    | 16                | 8                 | 5                 | 13                  |
| <b>NP</b>      | 24                | 8                 | n/a               | 8                   |
| <b>GP</b>      | 21                | 10                | 0                 | 10                  |
| <b>L</b>       | 51                | 0*                | 31                | 31                  |
| <b>Total</b>   | 165               | 43                | 49                | 92                  |

**Supplementary Table 18:** Summary of the structures used for SDP investigation.

| Protein                        | Species | PDB Structure ID   | Oligomeric Form             | Residue Coverage                   |
|--------------------------------|---------|--------------------|-----------------------------|------------------------------------|
| VP24                           | EBOV    | 4M0Q               | Homodimer                   | 11 - 237                           |
|                                | EBOV    | 4U2X               | Heterodimer<br>(with KPNA5) | 16 - 231                           |
| VP30                           | EBOV    | 2I8B               | Homodimer                   | 142 - 272                          |
| VP35                           | EBOV    | 4IBC               | Homodimer                   | 215 - 340                          |
|                                | EBOV    | 3L26               | Homodimer<br>(bound to RNA) | 215 - 340                          |
|                                | EBOV    | 6GBO               | Homotrimer                  | 81 - 153                           |
| VP40                           | EBOV    | 4LDB               | Homodimer                   | 44 - 326                           |
|                                | EBOV    | 4LDD               | Homo 6-mer                  | 44 - 326                           |
|                                | EBOV    | 4LDM               | Homo 8-mer                  | 44 - 188                           |
| NP                             | EBOV    | 4QB0               | Monomer                     | 641 - 739                          |
|                                | EBOV    | 4YPI               | Heterodimer                 | 38 - 385                           |
| GP                             | EBOV    | 5JQ3               | Hetero 6-mer                | 32 – 501<br>& 502 – 632            |
| L                              | EBOV    | N/A (Phyre2 model) | Monomer                     | 8 - 2010                           |
| Nucleocapsid<br>(NP with VP24) | EBOV    | 6EHM               | Hetero 4-mer                | NP:<br>1 – 739<br>VP24:<br>1 - 251 |

**Supplementary Table 19:** Summary of the SDPs with proposed functional impacts identified using the 196 and the 1,408 genome sets.

| Protein | SDP   | Functional Effect                                 | Confidence | Status   |
|---------|-------|---------------------------------------------------|------------|----------|
| NP      | R105K | Stability: Loss of hydrogen bonding               | Possible   | Retained |
| NP      | A705R | Stability: Introduction of salt bridge with E694  | Possible   | Lost     |
| VP35    | E269D | Interface: Dimeric VP35 interface                 | Probable   | Retained |
| VP40    | P85T  | Interface: Octameric VP40 interface               | Probable   | Retained |
| VP40    | Q245P | Stability: Breaks an alpha helix                  | Probable   | Retained |
| GP      | I260L | Interface: Within GP glycan cap                   | Possible   | Retained |
| GP      | T269S | Interface: Within GP glycan cap                   | Possible   | Retained |
| GP      | S307H | Interface: Within GP glycan cap                   | Possible   | Retained |
| VP30    | R262A | Interface: Dimer interface, loss of hydrogen bond | Probable   | Retained |
| VP24    | T131S | Interface: With KPNA5                             | Probable   | Retained |
| VP24    | M136L | Interface: With KPNA5                             | Probable   | Retained |
| VP24    | Q139R | Interface: With KPNA5                             | Probable   | Retained |
| VP24    | R140S | Interface: With KPNA5                             | Probable   | Gained   |
| VP24    | T226A | Stability: Loss of hydrogen bond                  | Probable   | Retained |



**Supplementary Table 20:** Comparison of *Bombali virus* SDP amino acids with *Ebola virus* and *Reston virus*

| Protein      | Number of SDPs | Residues the same as: (%) |              |             |
|--------------|----------------|---------------------------|--------------|-------------|
|              |                | Ebola virus               | Reston virus | Neither     |
| GP           | 20             | 55                        | 10           | 35          |
| L            | 53             | 77.36                     | 11.32        | 11.32       |
| NP           | 24             | 62.5                      | 12.5         | 25          |
| VP24         | 11             | 72.73                     | 18.18        | 9.09        |
| VP30         | 20             | 30                        | 10           | 60          |
| VP35         | 22             | 72.73                     | 13.64        | 13.64       |
| VP40         | 16             | 50                        | 18.75        | 31.25       |
| <b>Total</b> | <b>166</b>     | <b>63.25</b>              | <b>12.65</b> | <b>24.1</b> |

**Supplementary Table 21:** Summary of source databases used to obtain Ebolavirus genomes for analysis.

| <b>Species</b>          | <b>NCBI</b> | <b>ViPR</b> | <b>Urbanowicz</b> | <b>Total</b> |
|-------------------------|-------------|-------------|-------------------|--------------|
| <i>Ebola virus</i>      | 1,469       | 43          | 505               | 2,017        |
| <i>Sudan virus</i>      | 14          | 5           | 0                 | 19           |
| <i>Bundibugyo virus</i> | 7           | 2           | 0                 | 9            |
| <i>Tai Forest virus</i> | 1           | 3           | 0                 | 4            |
| <i>Reston virus</i>     | 18          | 9           | 0                 | 27           |
| Total                   | 1,509       | 62          | 505               | 2,076        |

**Supplementary Table 22:** Summary of the sequences removed from the initial set of ebolavirus genome sequences.

| Species                 | Starting | Removed | Final |
|-------------------------|----------|---------|-------|
| <i>Ebola virus</i>      | 2,017    | 661     | 1,356 |
| <i>Sudan virus</i>      | 19       | 5       | 14    |
| <i>Bundibugyo virus</i> | 9        | 1       | 8     |
| <i>Tai Forest virus</i> | 4        | 1       | 3     |
| <i>Reston virus</i>     | 27       | 0       | 27    |
| Total                   | 2,076    | 668     | 1,408 |
